# Supplementary material for: A serendipitous self-assembly synthesis of CNN–Pt pincer complexes
Source: Royal Society of Chemistry journal article supplement (doi:10.1039/d1nj03005a), 2021-01-01
Supplement: d1nj03005a1.pdf [file d1nj03005a1.pdf]

Supporting Information  
for

## ***A serendipitous self-assembly synthesis of CNN-Pt pincer complexes***

Eva Sánchez-Pérez,<sup>ab</sup> Fernando Santos-Escobar,<sup>b</sup> Félix Gutiérrez-Corona,<sup>b</sup> Kazimierz Wrobel,<sup>a</sup> Katarzyna Wrobel\*<sup>a</sup>  
and Oracio Serrano\*<sup>a</sup>

---

<sup>a</sup>. Departamento de Química, Sede Pueblito de Rocha, Universidad de Guanajuato, Cerro de la Venada s/n, Guanajuato, Gto., México, C.P. 36040.

<sup>b</sup>. Departamento de Biología Experimental, Universidad de Guanajuato, Noria Alta, Guanajuato, Gto., México, C.P. 36020.

Email: [katarzyn@ugto.mx](mailto:katarzyn@ugto.mx)

Email: [oraciosinh@ugto.mx](mailto:oraciosinh@ugto.mx)

### ***Index***

|                                                                                                                                      |   |
|--------------------------------------------------------------------------------------------------------------------------------------|---|
| <b>Figure S.I.1.</b> A set of <sup>13</sup> C{ <sup>1</sup> H} (blue), APT (red) and DEPT (green) spectra of compound <b>2</b> ..... | 1 |
| <b>Figure S.I.2.</b> NOESY spectra of compound <b>3</b> .....                                                                        | 2 |
| All compound's figures.....                                                                                                          | 3 |

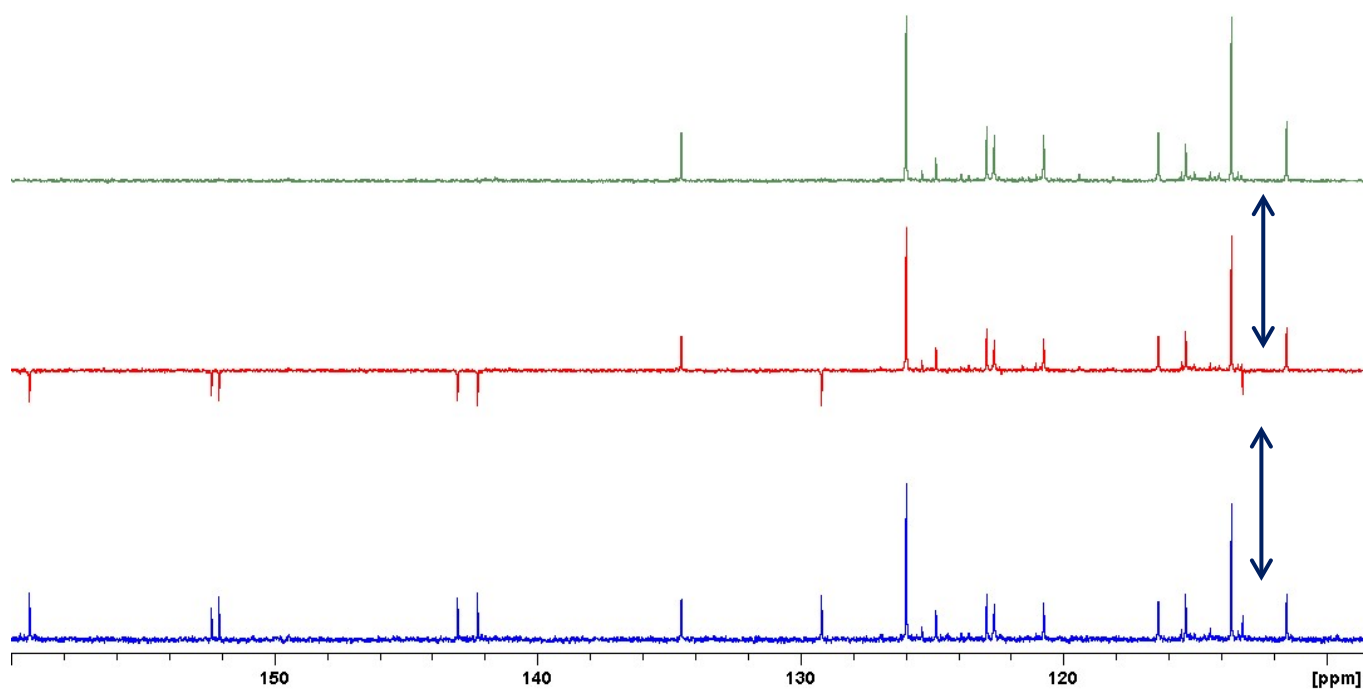

Figure S.I.1. A set of  $^{13}\text{C}\{^1\text{H}\}$  (blue), APT (red) and DEPT (green) spectra of compound **2** (Arrows  $\Leftrightarrow$  indicate the quaternary carbon of Pt- $\text{C}_{\text{sp}^2}$  bond).

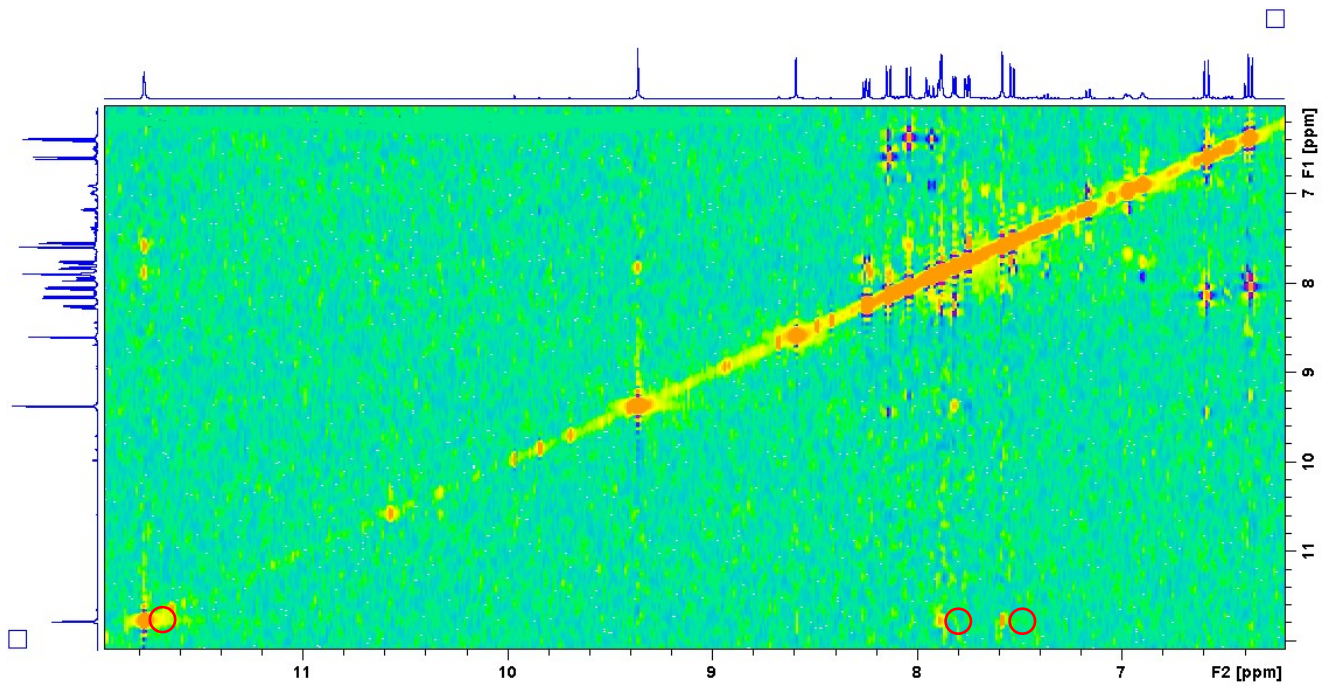

Figure S.I.2. NOESY spectra of compound 3.

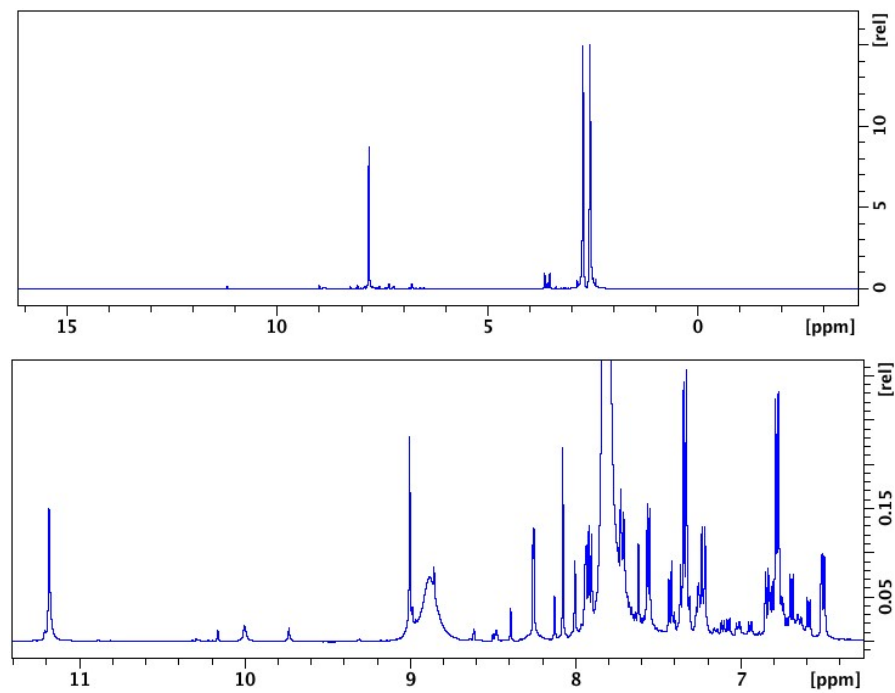

**Figure S.I.3.** <sup>1</sup>H NMR spectrum of crude solution for the reaction of  $L_{OMe}$  and  $K_2PtCl_4$  in DMF (using dms<sup>o</sup>-d<sub>6</sub> capillary),  
a) full spectra and b) zoom of aromatic region.

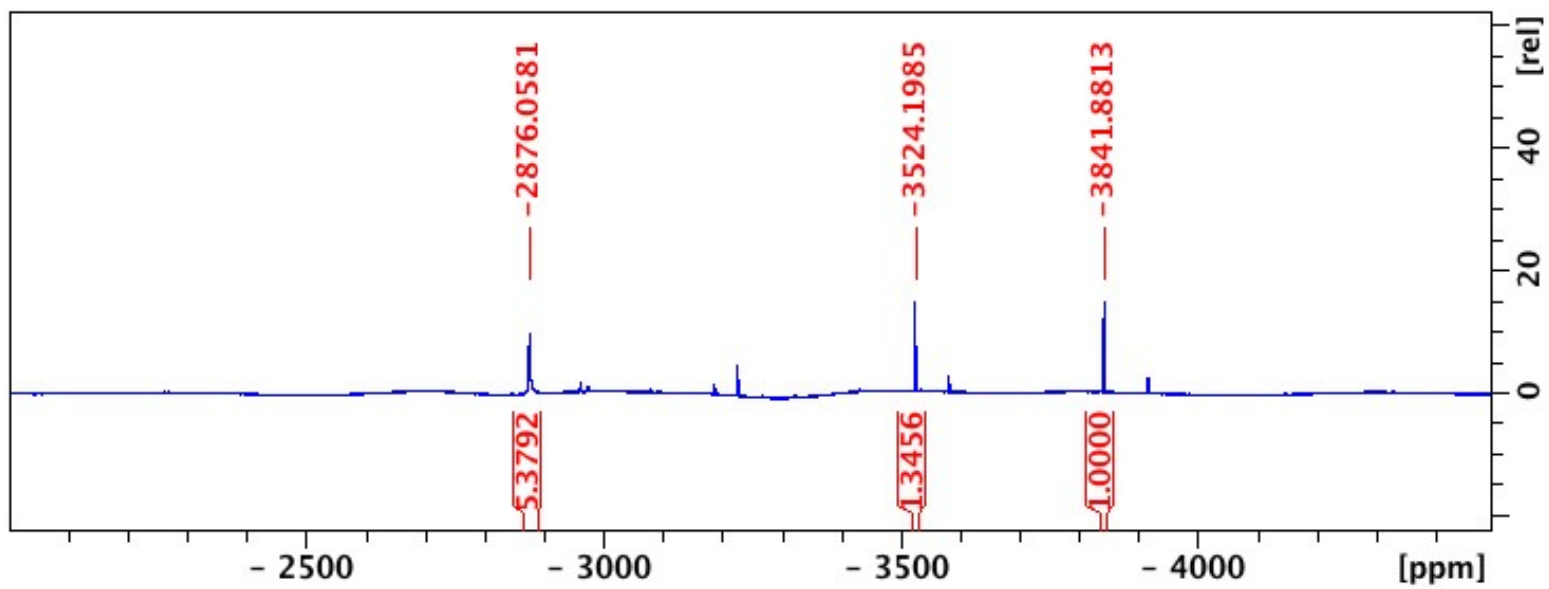

Figure S.I.4.  $^{195}\text{Pt}$  NMR of crude solution for the reaction of  $\text{L}_{\text{OMe}}$  and  $\text{K}_2\text{PtCl}_4$  in DMF.

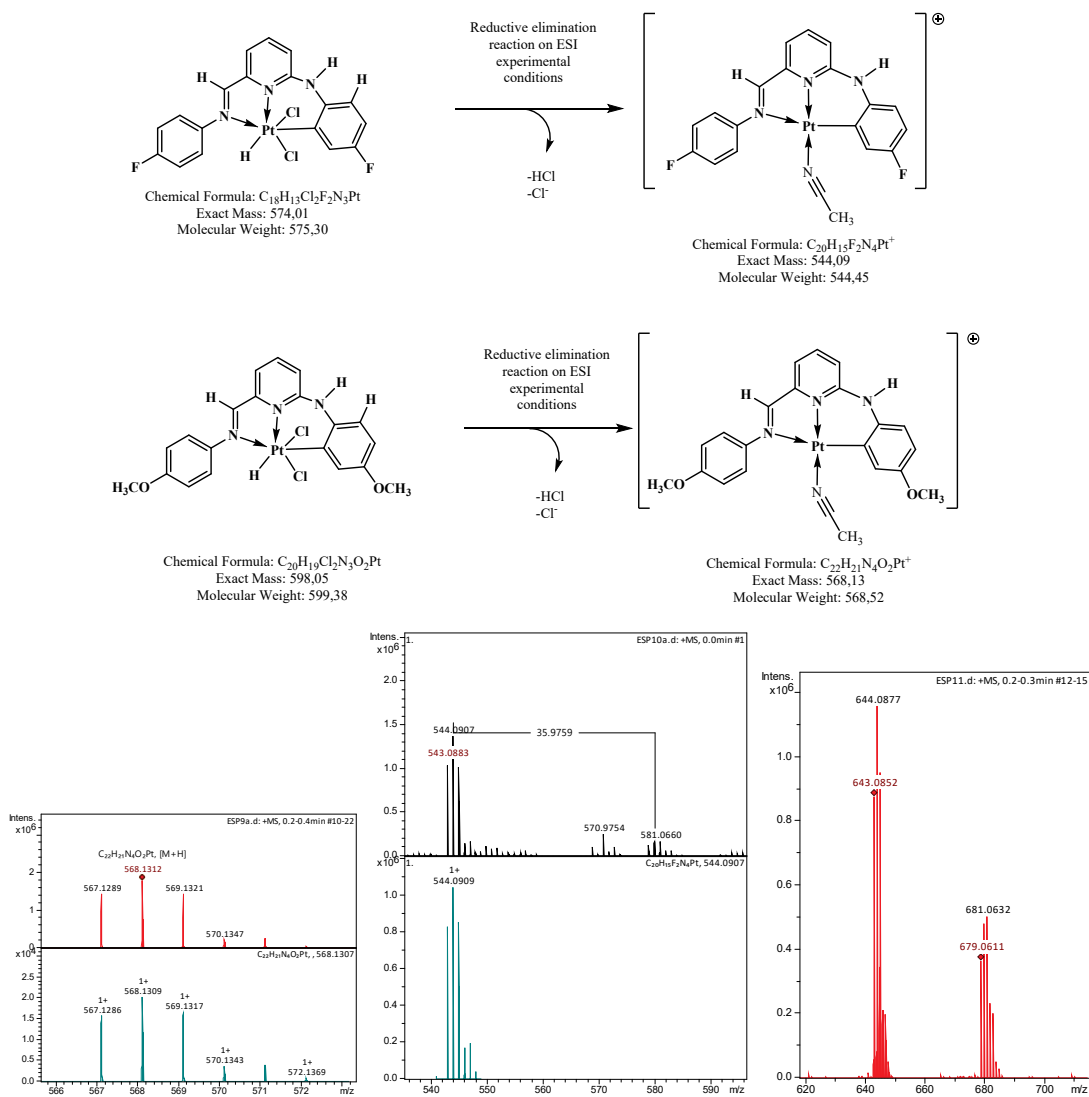

Figure S.I.5. ESI-MS spectra for compounds 1-3.

Spectra for  $L_{OMe}$ .

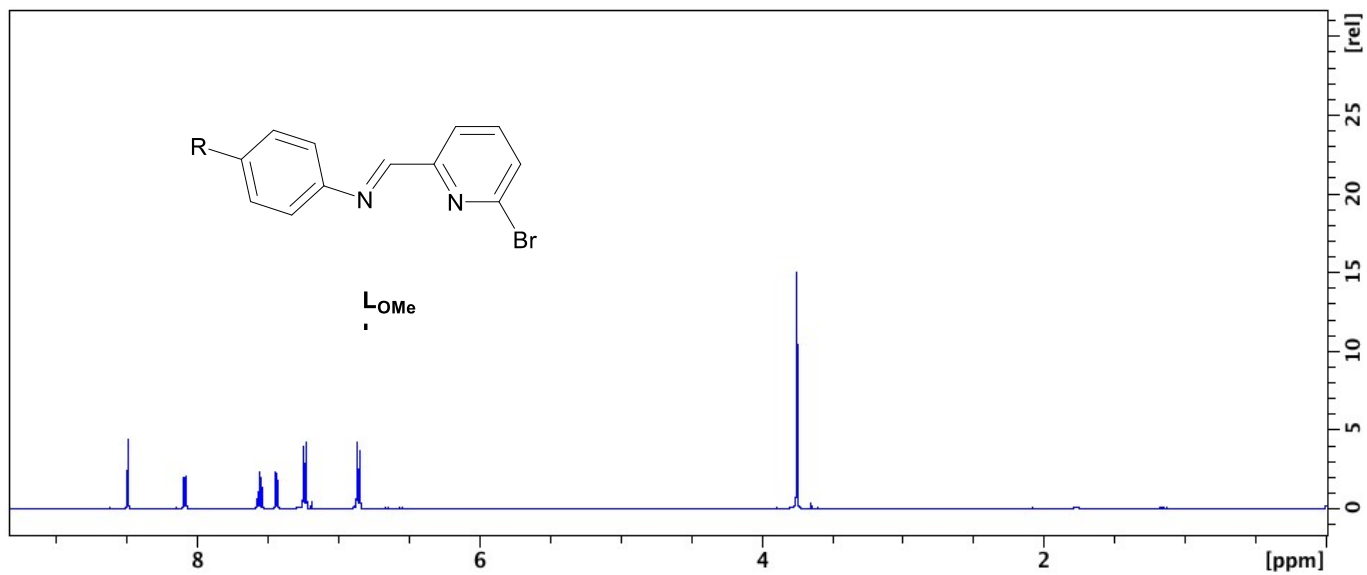

Figure S.I.6.  $^1\text{H}$  NMR spectra for compound  $\text{L}_{\text{OMe}}$  ( $\text{CDCl}_3$ ).

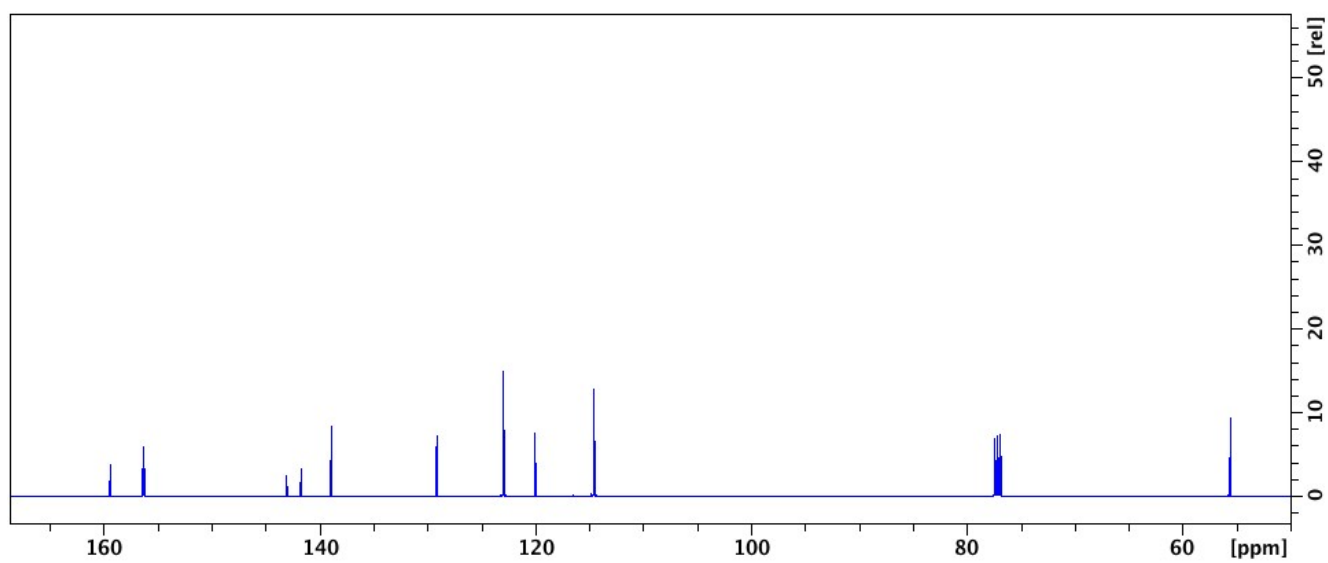

Figure S.I.7.  $^{13}\text{C}\{^1\text{H}\}$  NMR spectra for compound  $\text{L}_{\text{OMe}}$  ( $\text{CDCl}_3$ ).

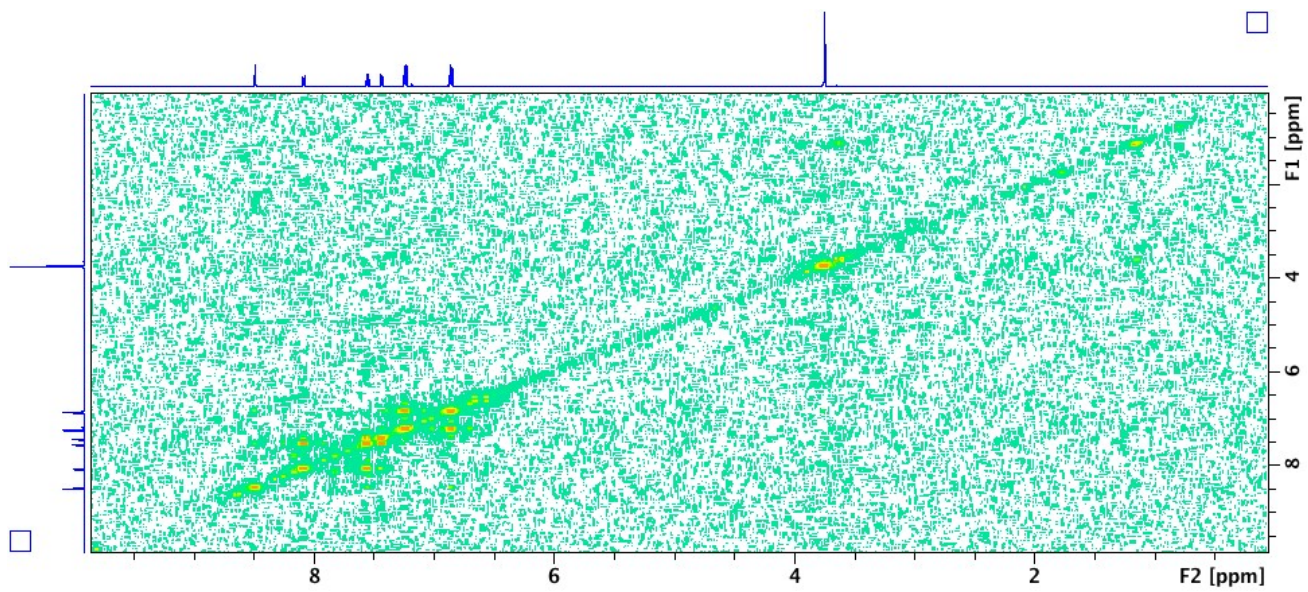

Figure S.I.8. COSY NMR spectra for compound  $L_{OMe}$  ( $CDCl_3$ ).



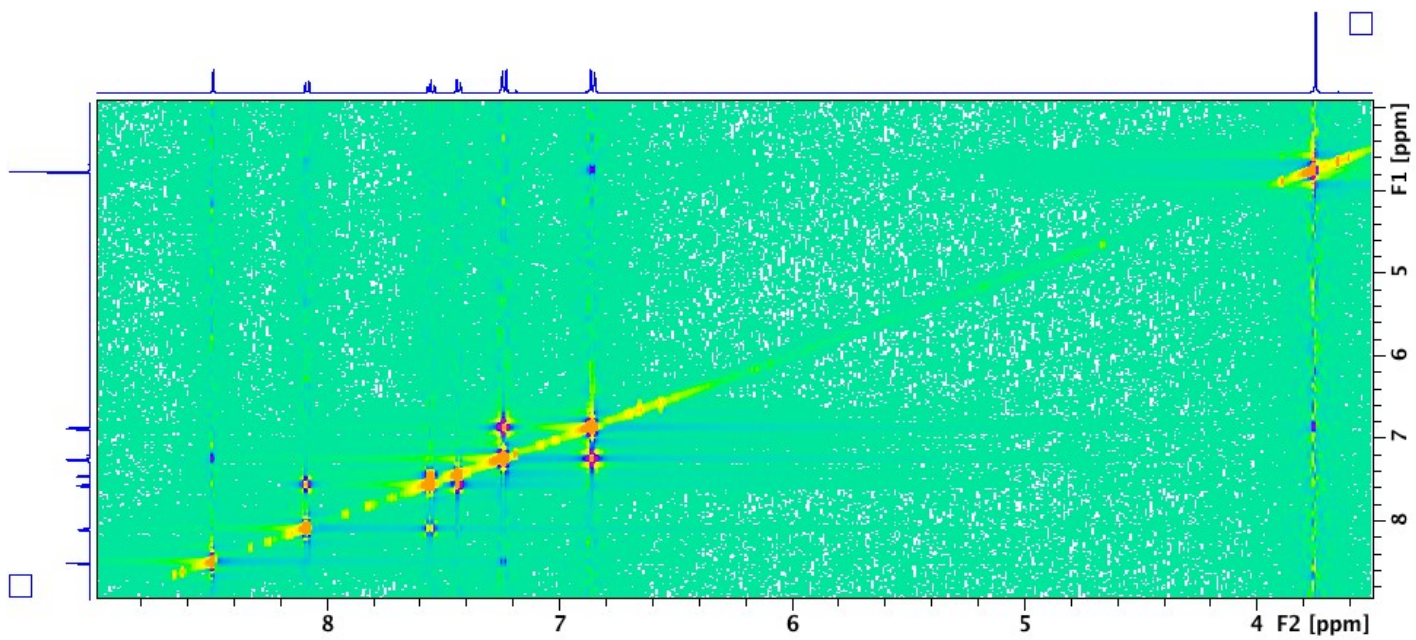

Figure S.I.9. NOESY NMR spectra for compound  $L_{OMe}$  ( $CDCl_3$ ).

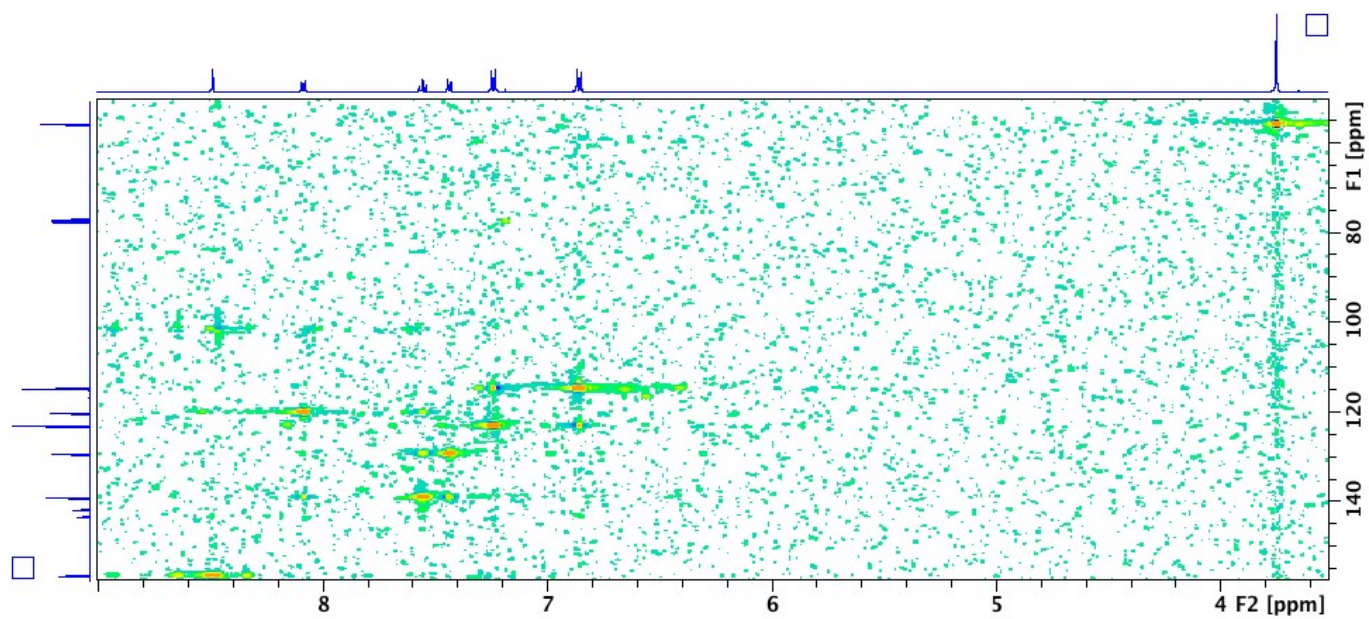

Figure S.I.10. HSQC NMR spectra for compound  $L_{OMe}$  ( $CDCl_3$ ).

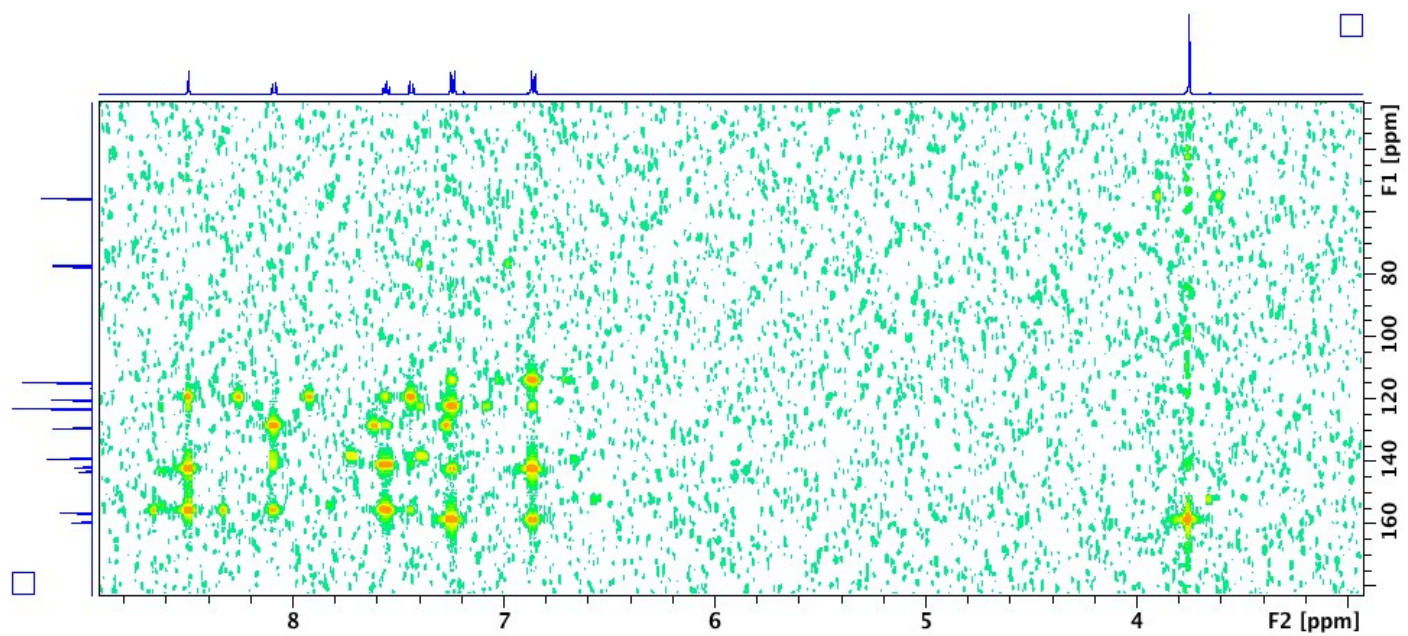

Figure S.I.11. HMBC NMR spectra for compound  $L_{OMe}$  ( $CDCl_3$ ).

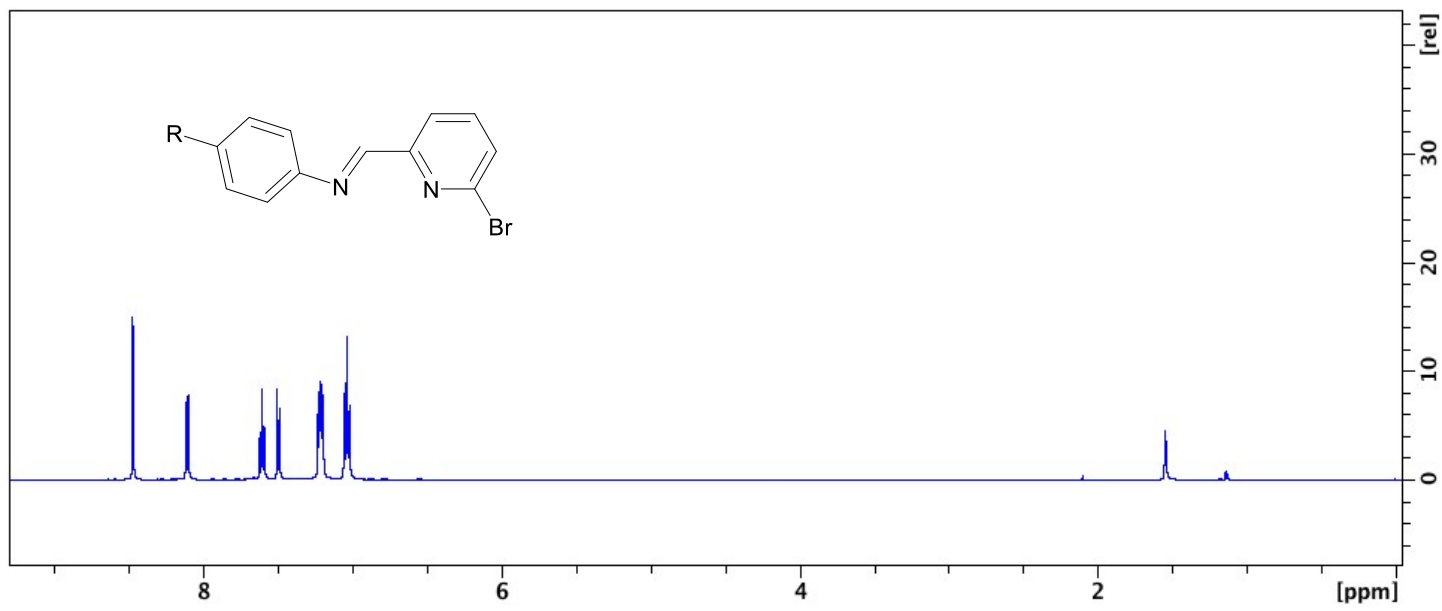

**Figure S.I.12.** <sup>1</sup>H NMR spectra for compound **L<sub>F</sub>** (CDCl<sub>3</sub>).

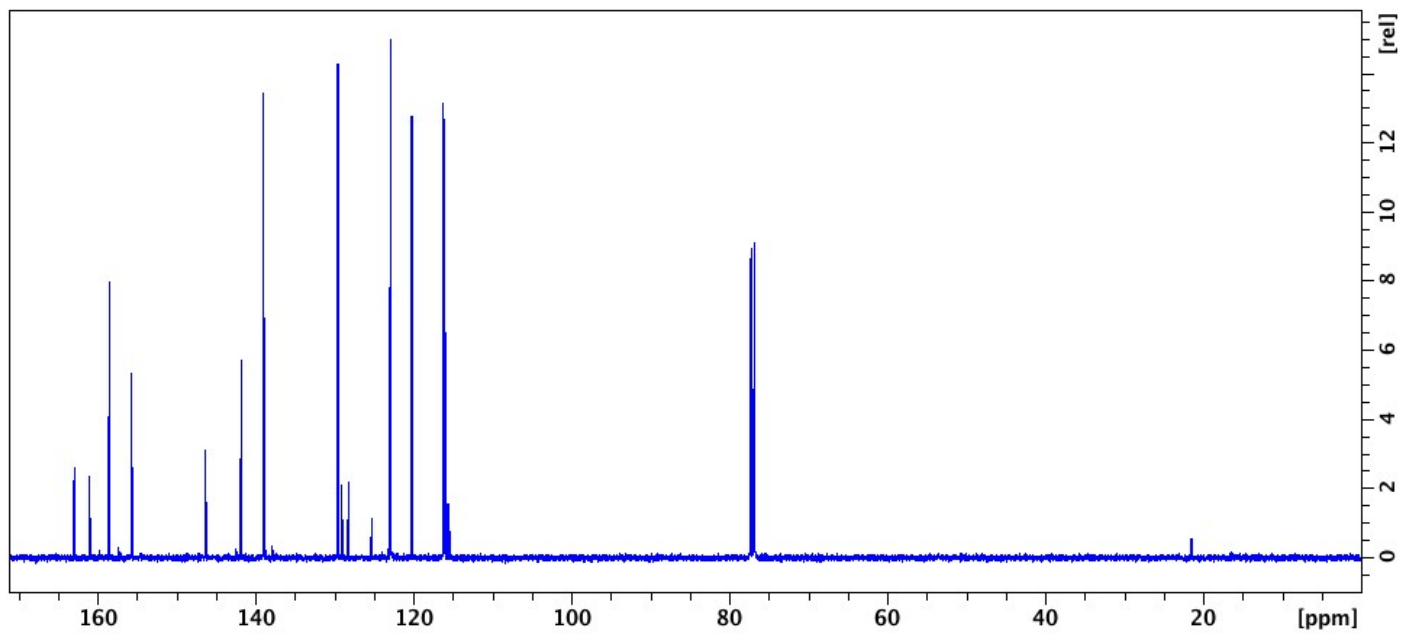

Figure S.I.13.  $^{13}\text{C}\{^1\text{H}\}$  NMR spectra for compound  $\text{L}_f$  ( $\text{CDCl}_3$ ).

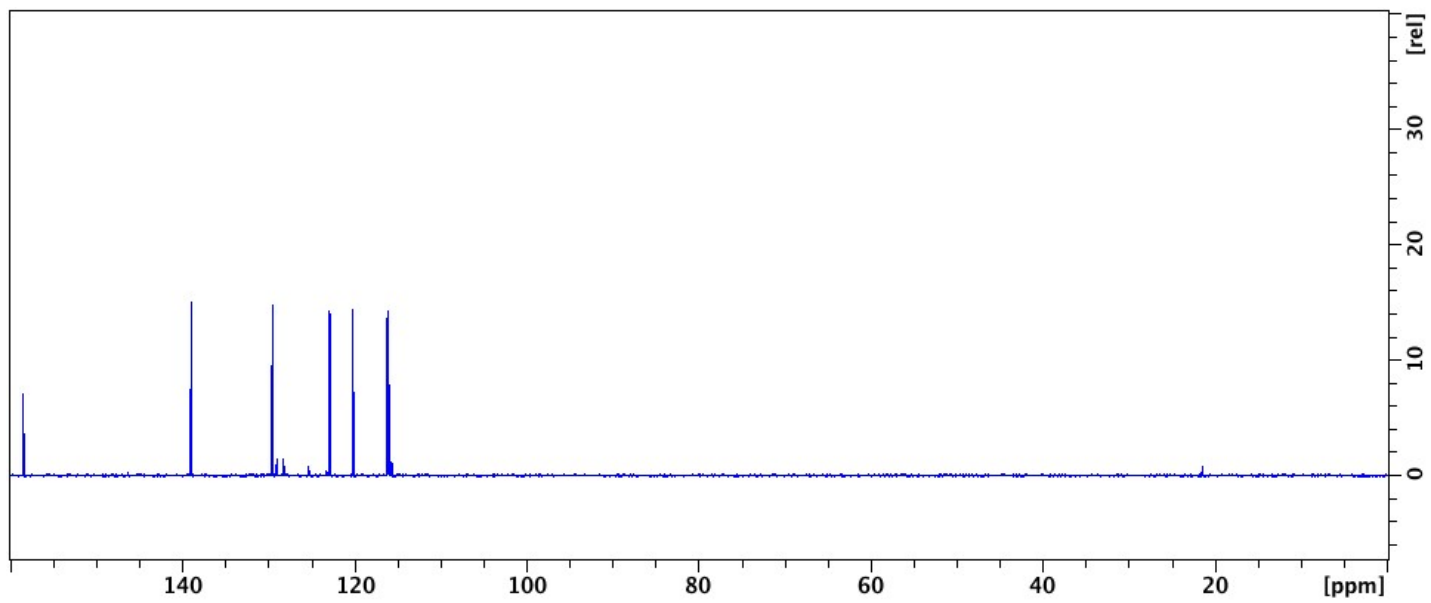

**Figure S.I.14.** DEPT NMR spectra for compound  $L_F$  ( $CDCl_3$ ).



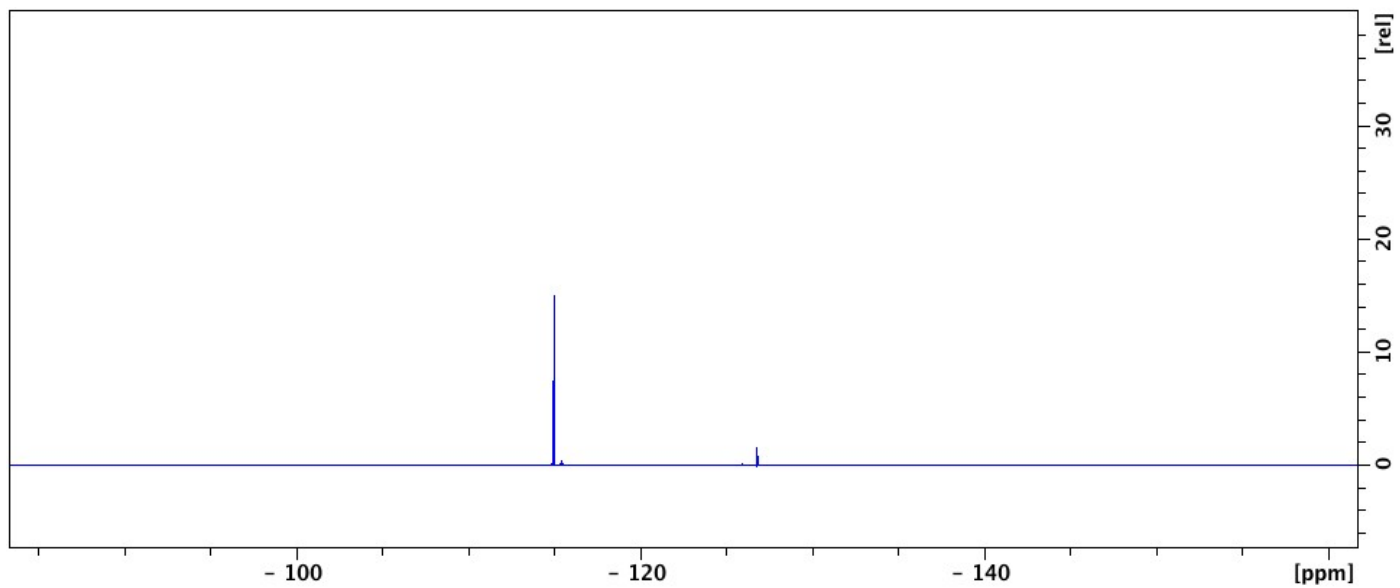

Figure S.I.15.  $^{19}\text{F}\{^1\text{H}\}$  NMR spectra for compound  $\text{L}_f$  ( $\text{CDCl}_3$ ).

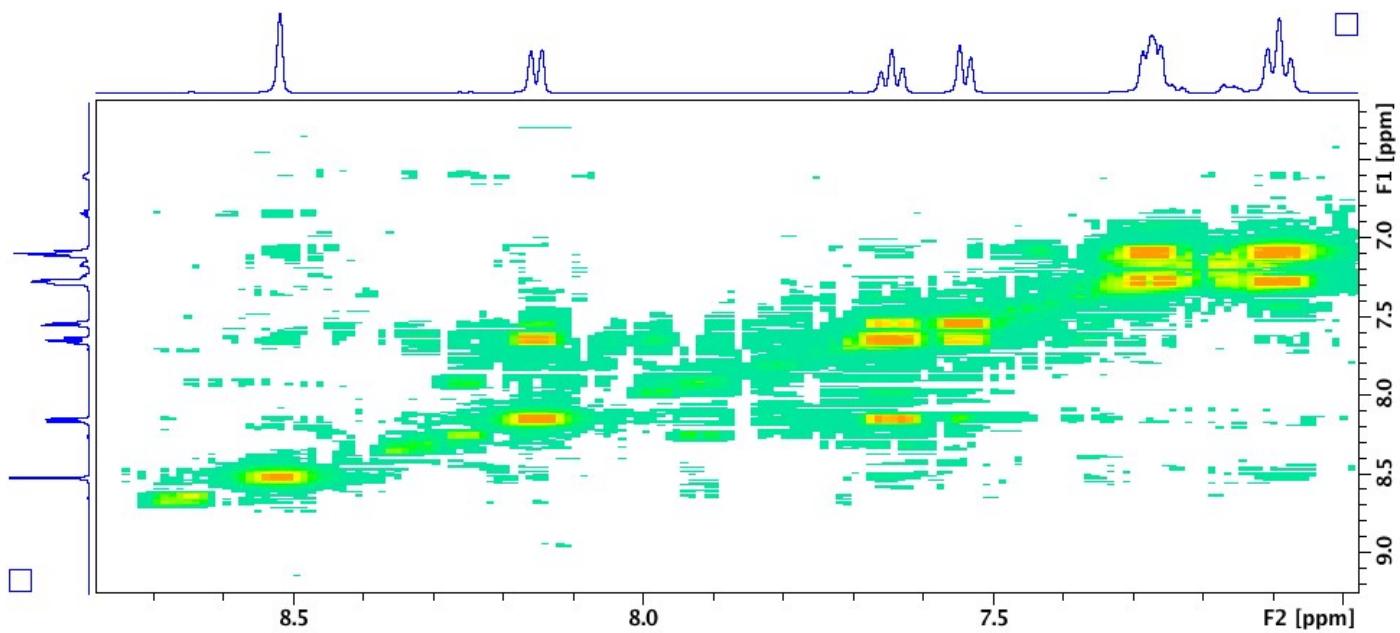

Figure S.I.16. COSY NMR spectra for compound  $\text{L}_f$  ( $\text{CDCl}_3$ ).

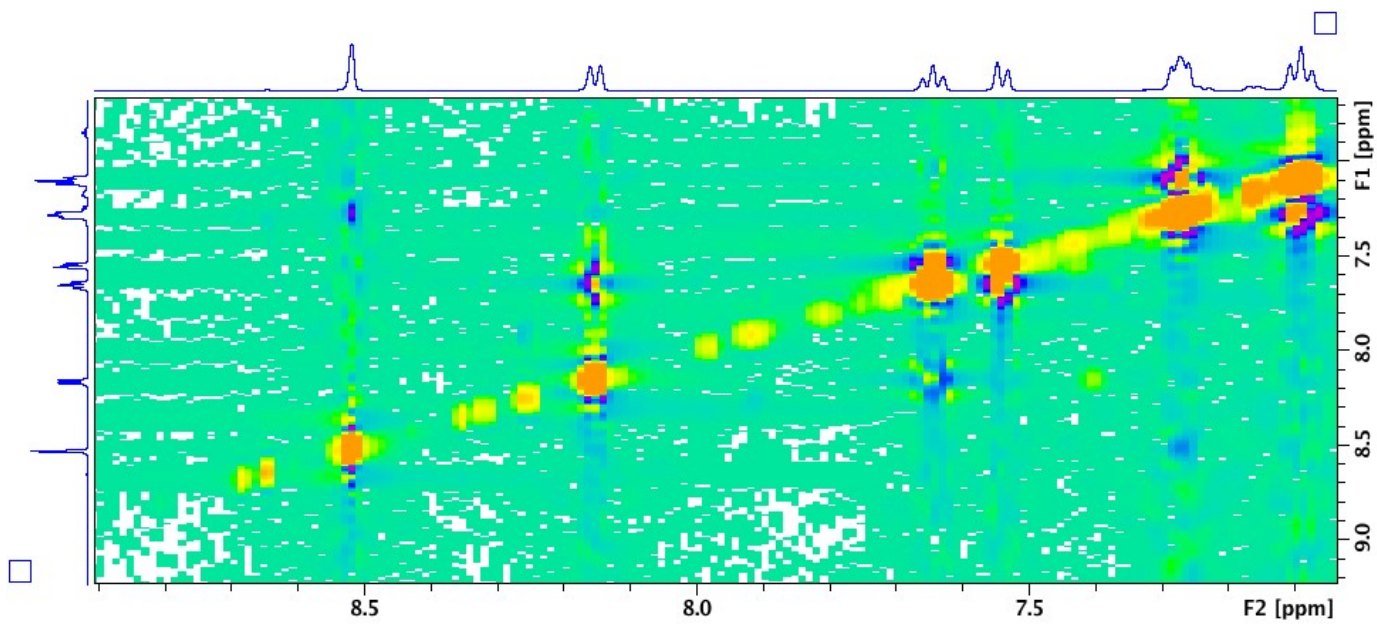

Figure S.I.17. NOESY NMR spectra for compound  $L_f$  ( $CDCl_3$ ).



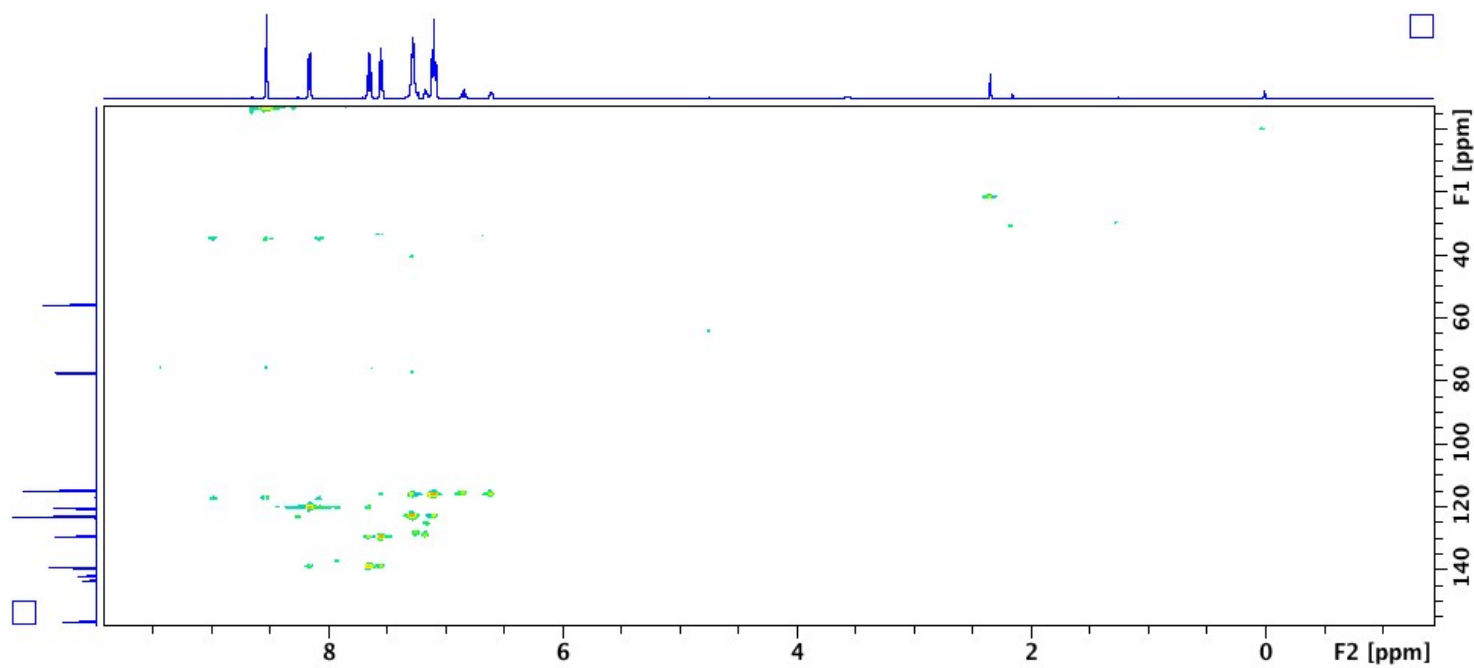

Figure S.I.18. HSQC NMR spectra for compound  $L_F$  ( $CDCl_3$ ).

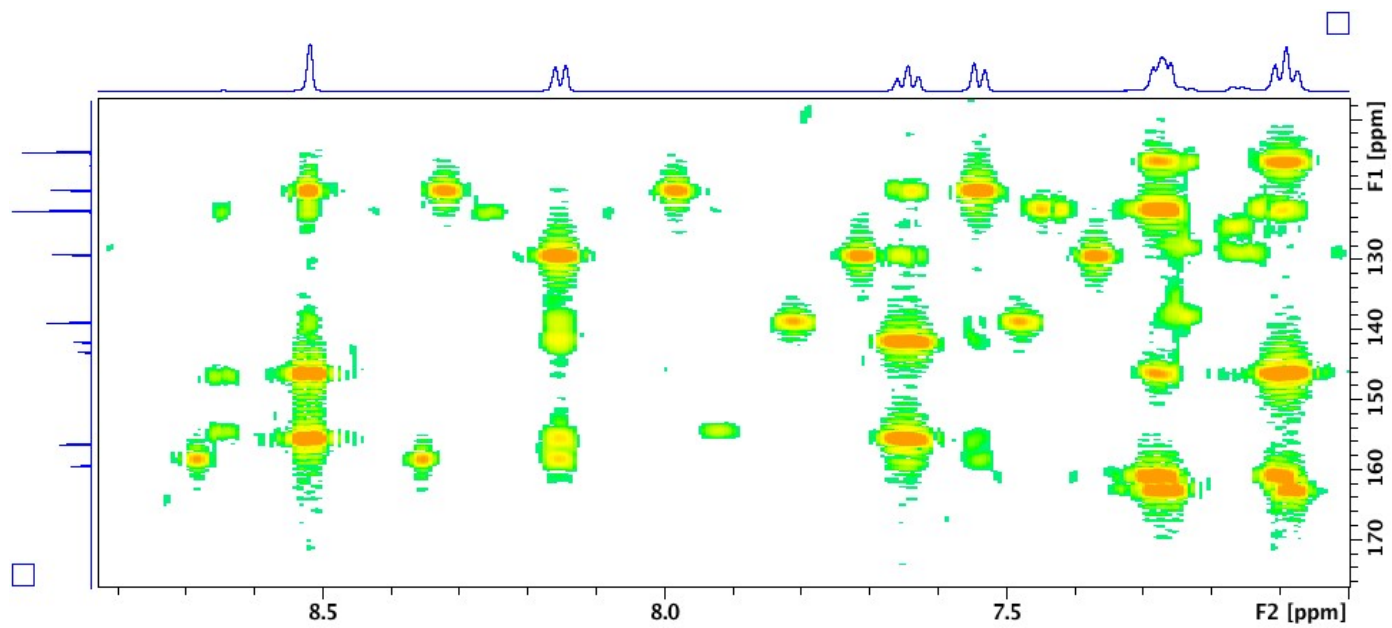

Figure S.I.19. HMBC NMR spectra for compound  $L_F$  ( $CDCl_3$ ).

Spectra for  $L_{cuma}$ .

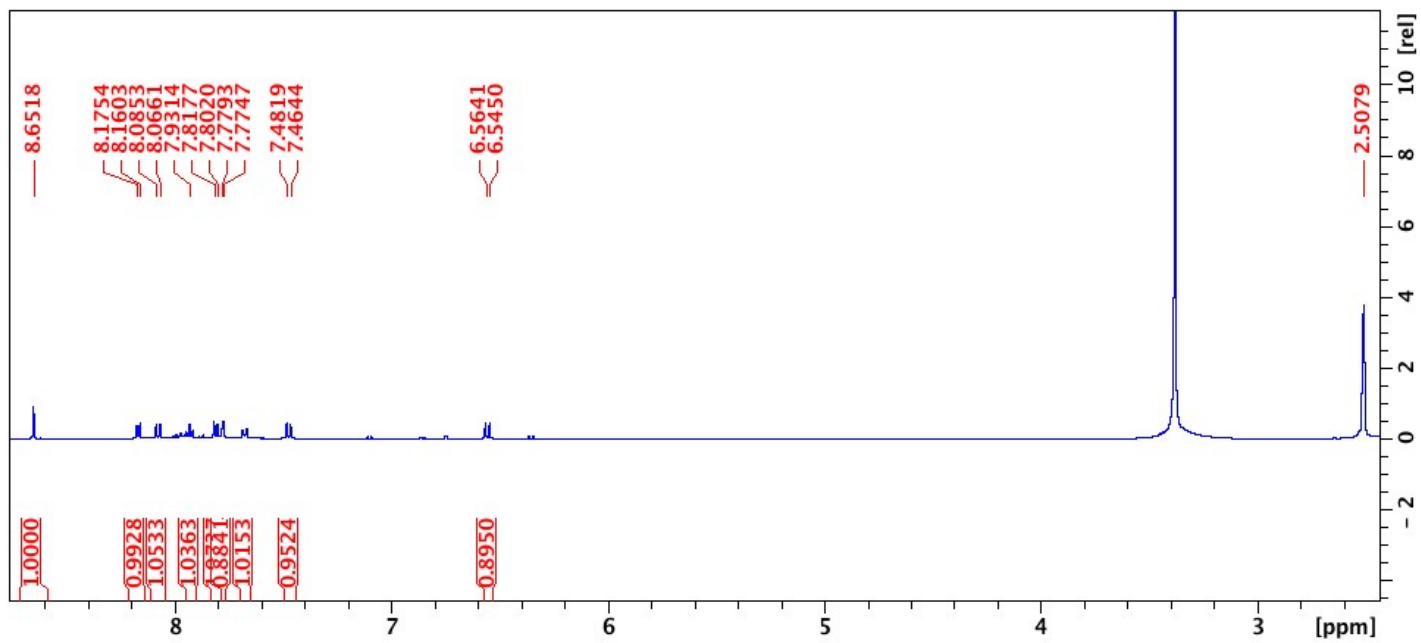

Figure S.I.20. <sup>1</sup>H NMR spectra for compound L<sub>cuma</sub> (DMSO-d<sub>6</sub>).

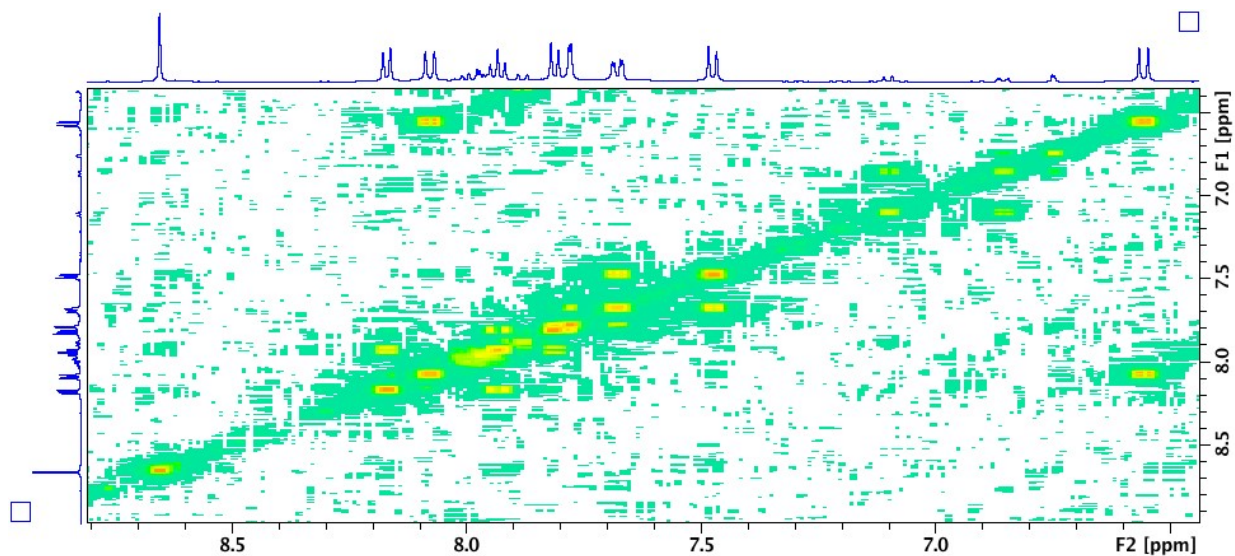

Figure S.I.21. COSY NMR spectra for compound  $L_{Cuma}$  (DMSO-d6).

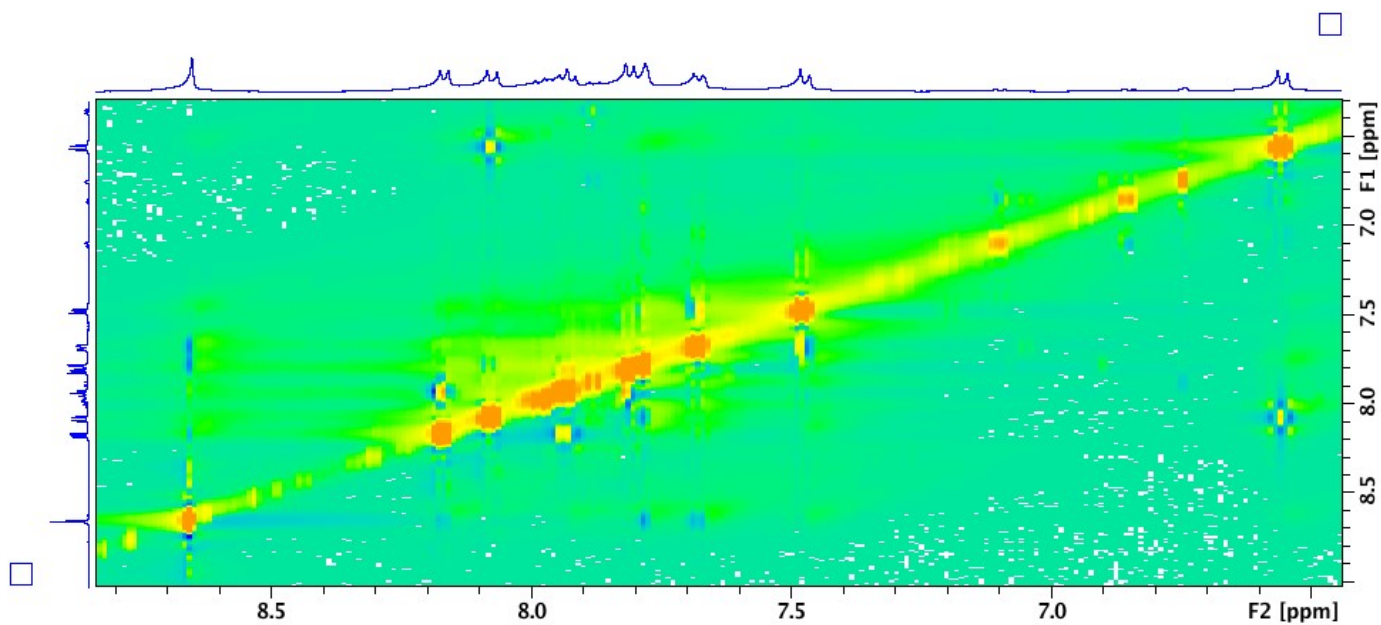

Figure S.I.22. NOESY NMR spectra for compound  $L_{Cuma}$  (DMSO-d6).

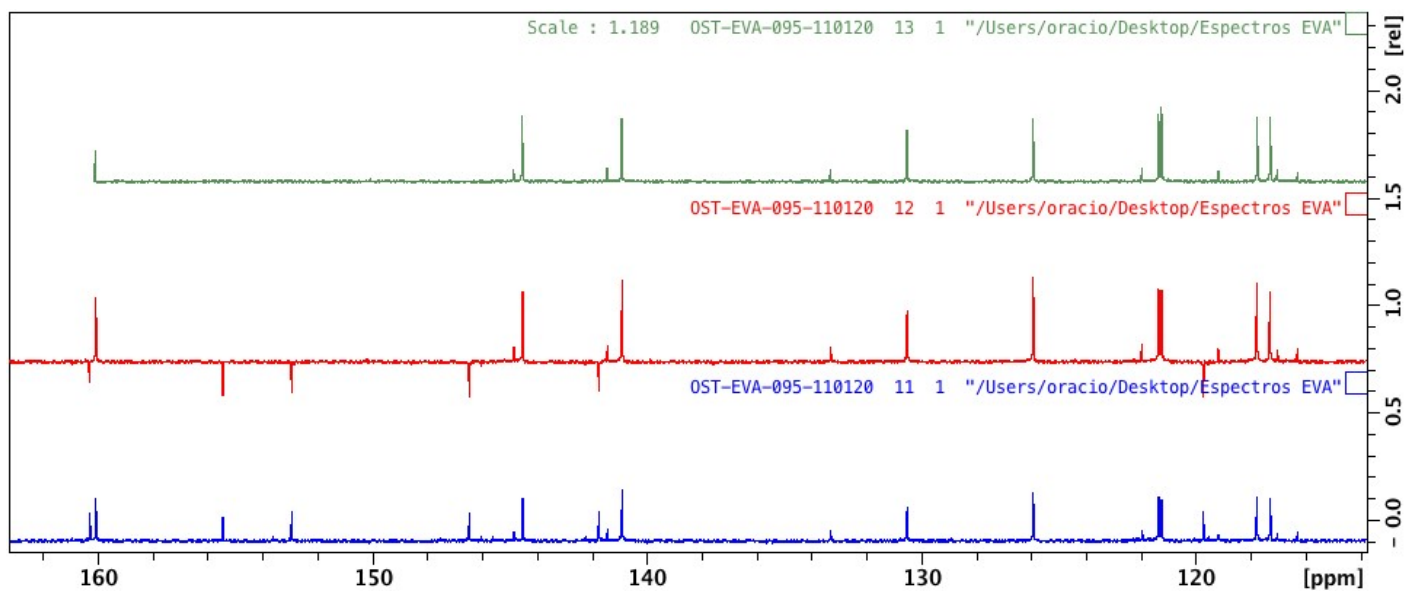

**Figure S.I.23.** Comparative of  $^{13}\text{C}\{^1\text{H}\}$  (blue), APT (red) and DEPT (green) spectrum of compound  $\text{L}_{\text{Cuma}}$ .

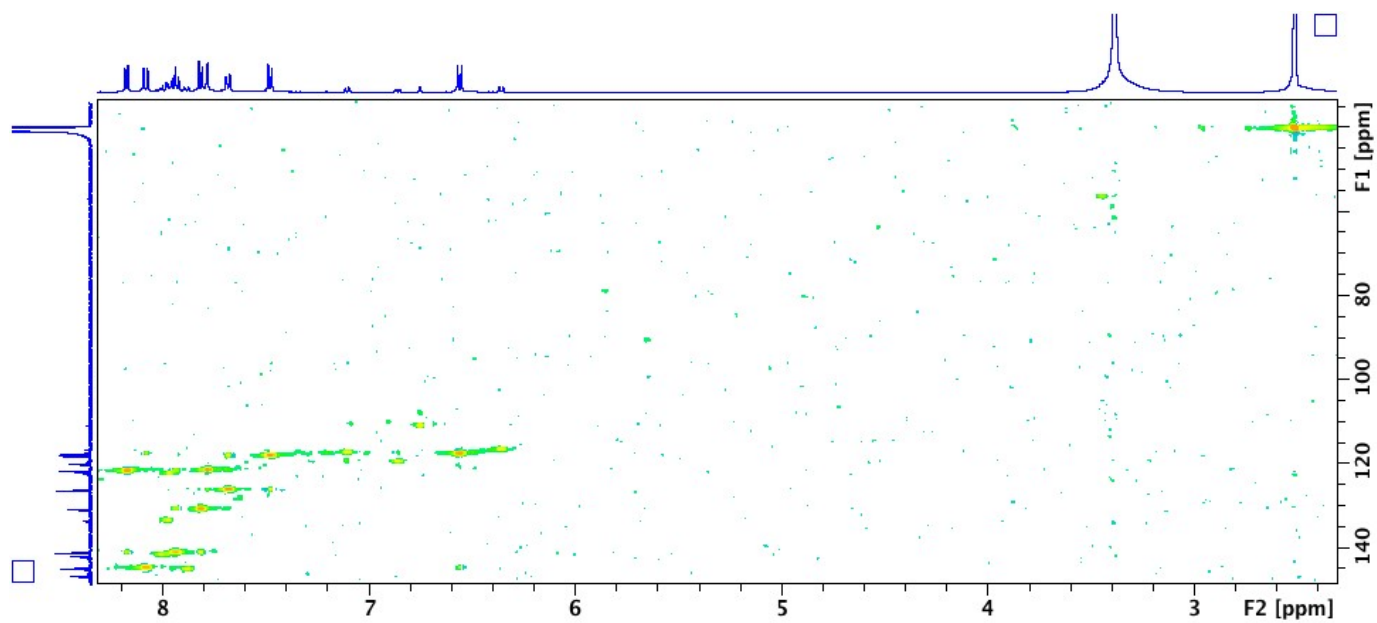

Figure S.I.24. HSQC NMR spectra for compound  $L_{Cuma}$  (DMSO-d6).

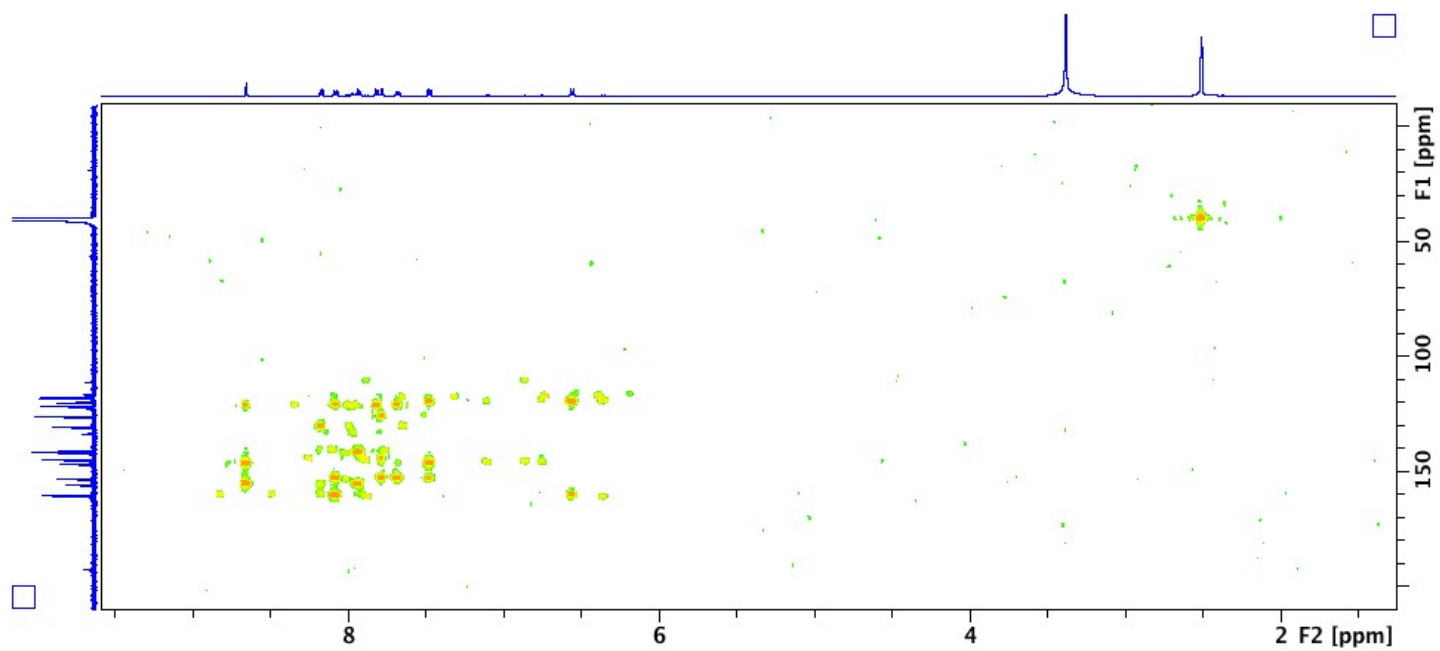

Figure S.I.25. HMBC NMR spectra for compound  $L_{Cuma}$  (DMSO-d6).

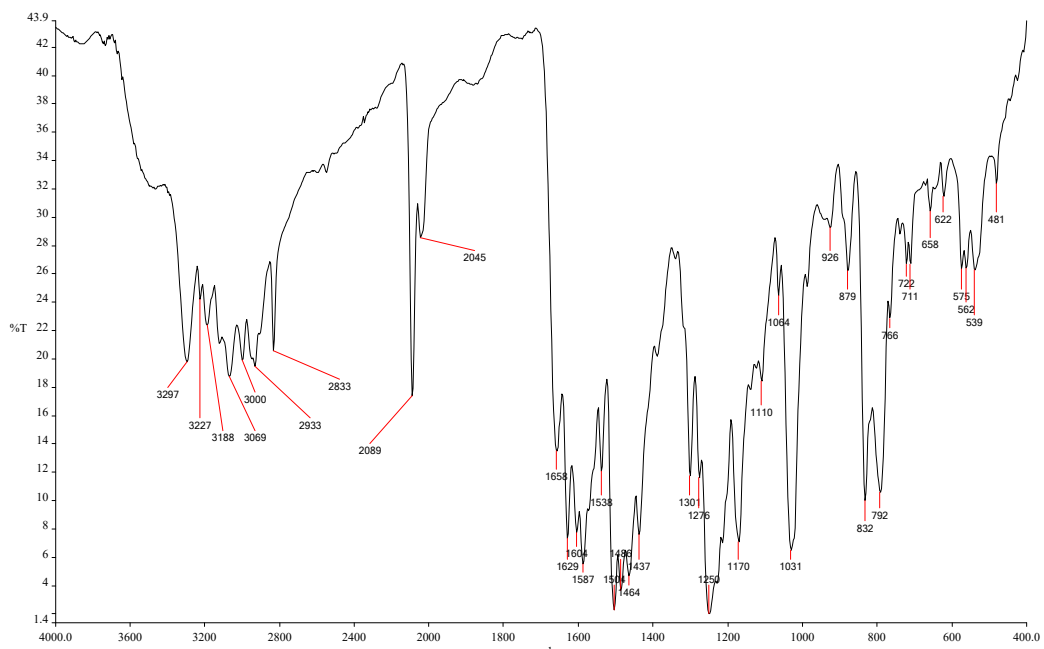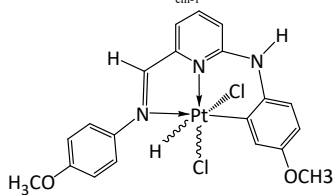

**1b**

**Figure S.I.26.** IR spectra for compound **1b** (KBr disk).



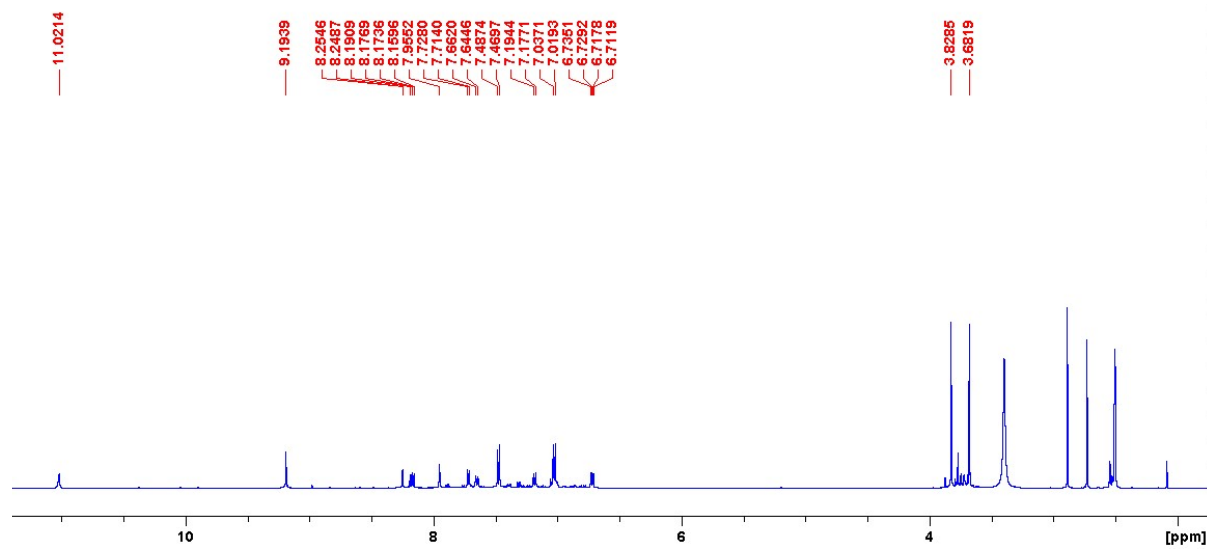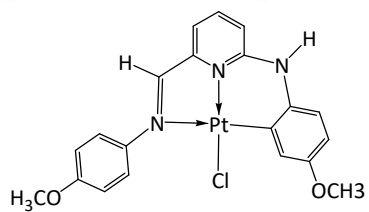

1

Figure S.I.27. <sup>1</sup>H NMR spectra for compound 1.

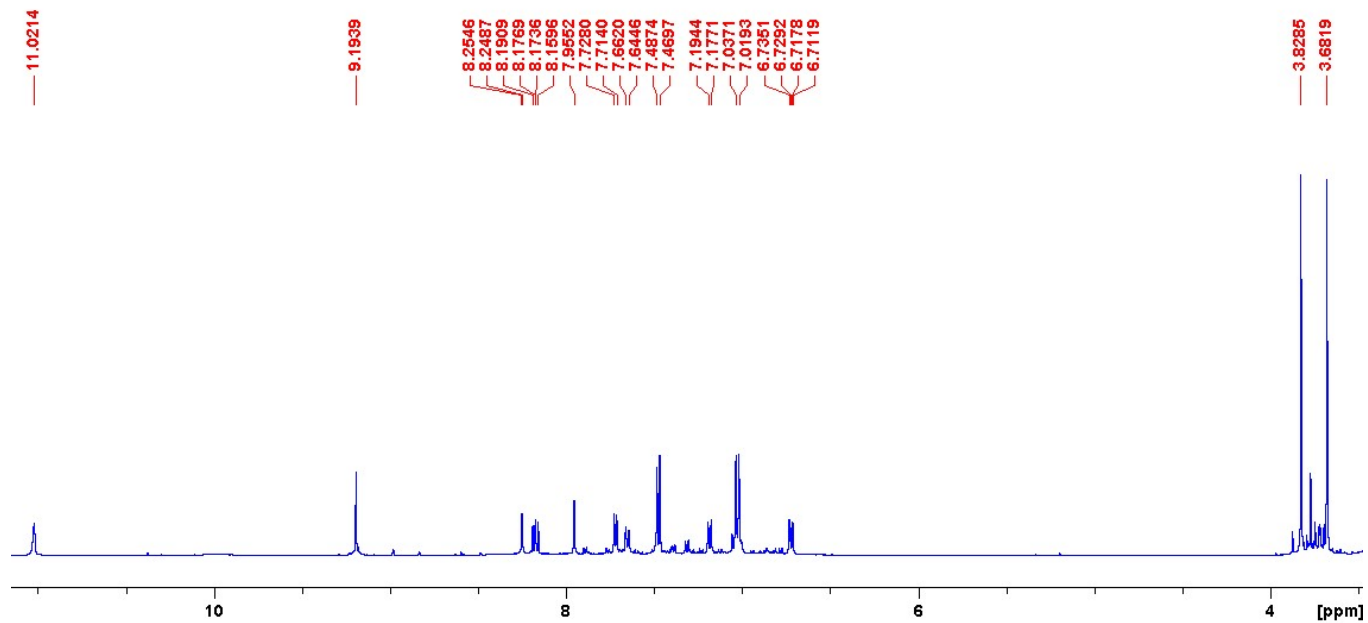

Figure S.I.28.  $^1\text{H}$  NMR spectra for compound 1 (Region from 3.5 to 11.2 ppm).

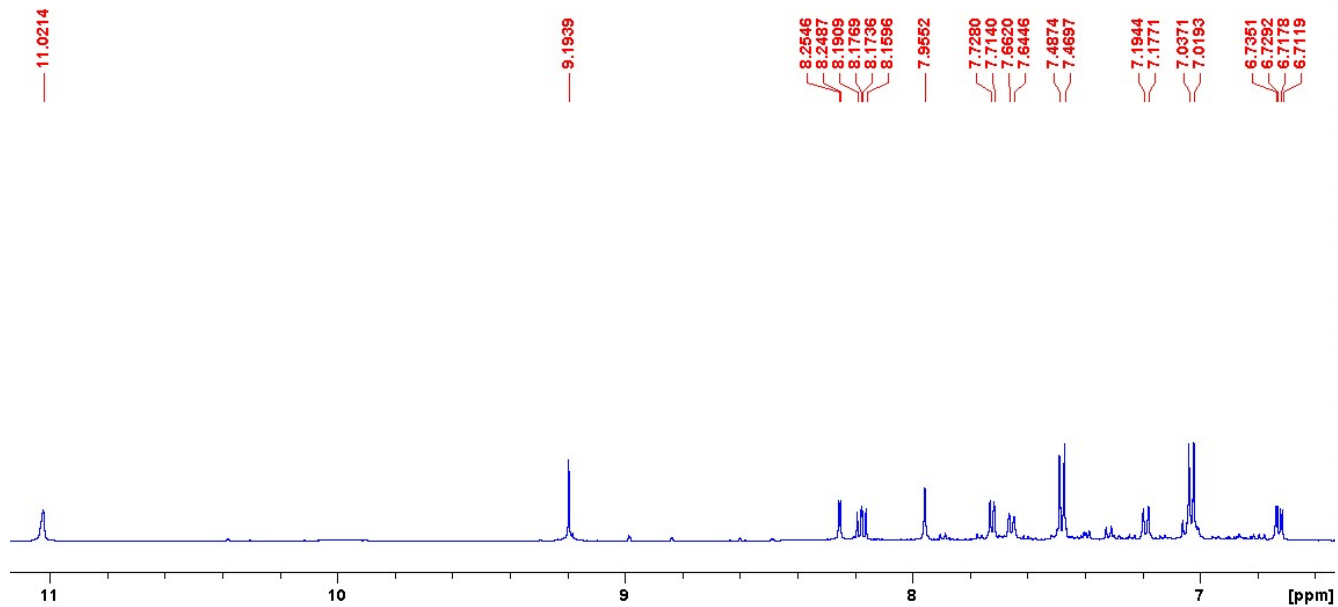

Figure S.I.29. <sup>1</sup>H NMR spectra for compound 1 (Region from 6.5 to 11.2 ppm).

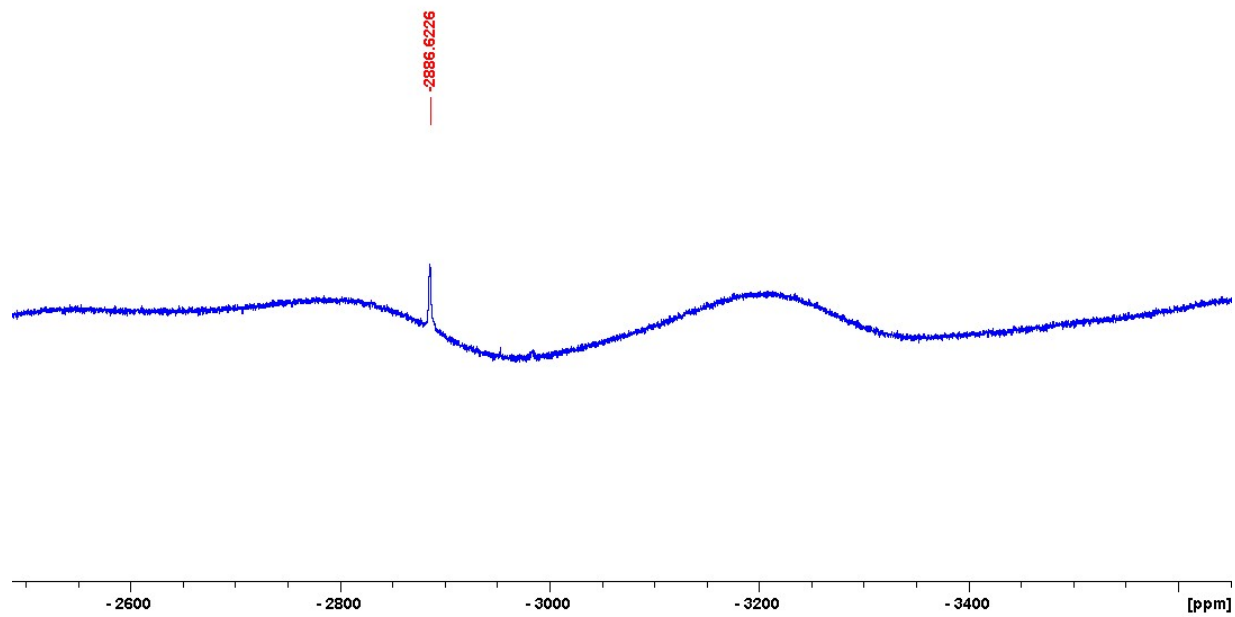

Figure S.I.30.  $^{195}\text{Pt}$  NMR spectra for compound 1.

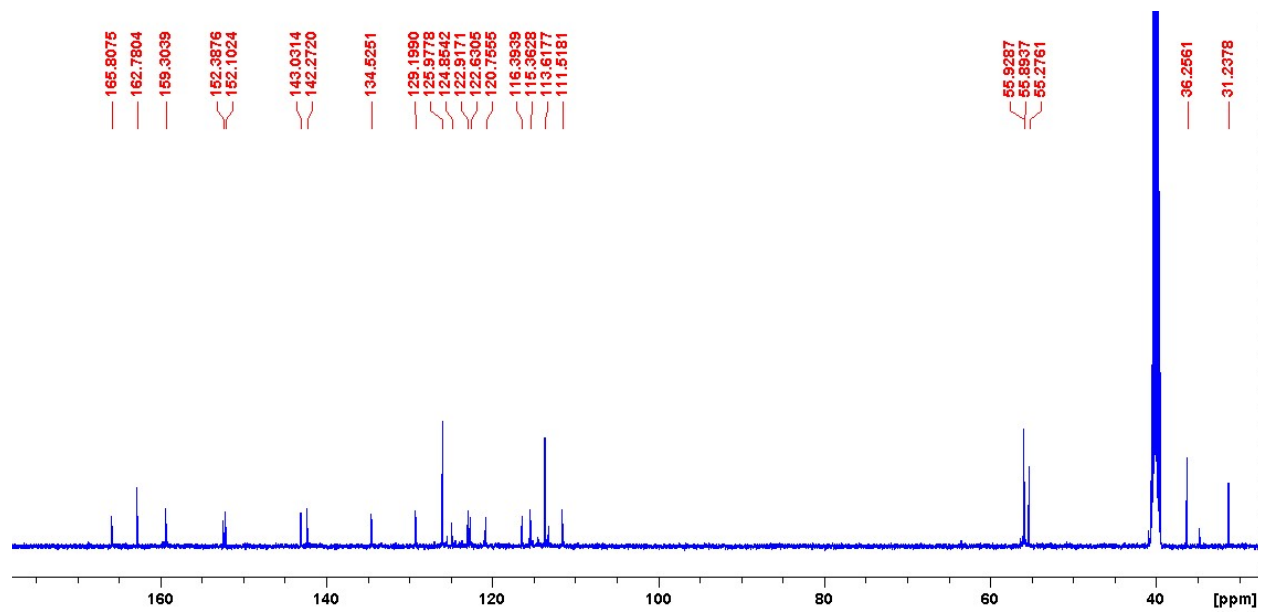

Figure S.I.31.  $^{13}\text{C}\{^1\text{H}\}$  NMR spectra for compound **1**.

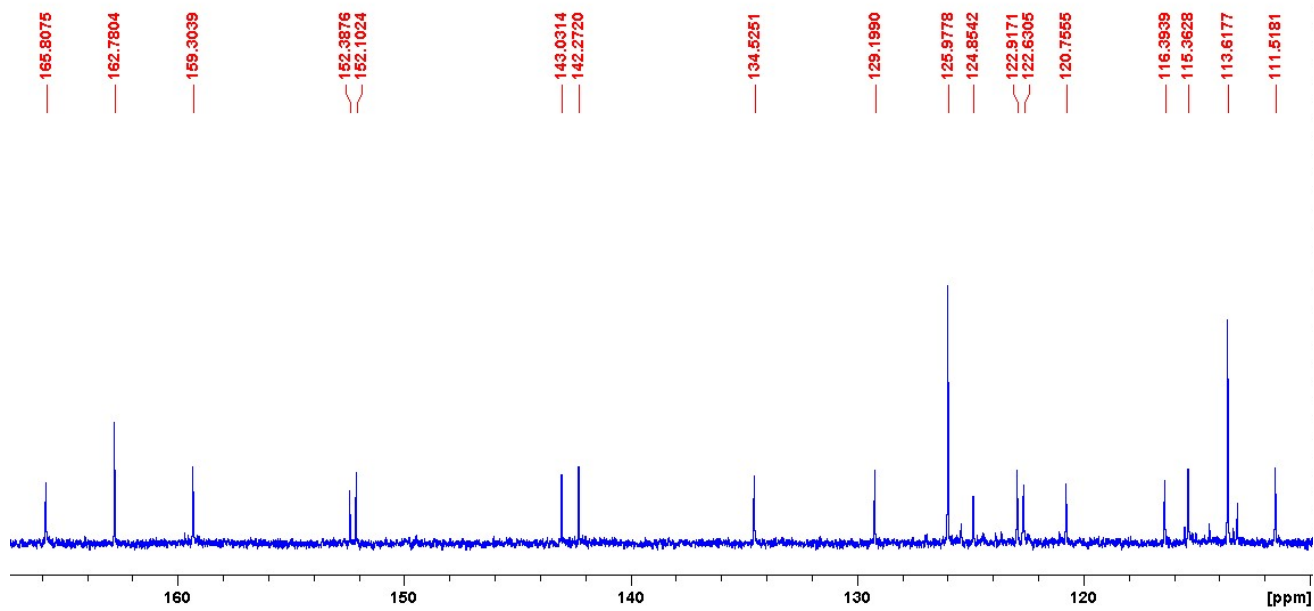

Figure S.I.32.  $^{13}\text{C}\{^1\text{H}\}$  NMR spectra for compound 1 (Region from 110 to 168 ppm).

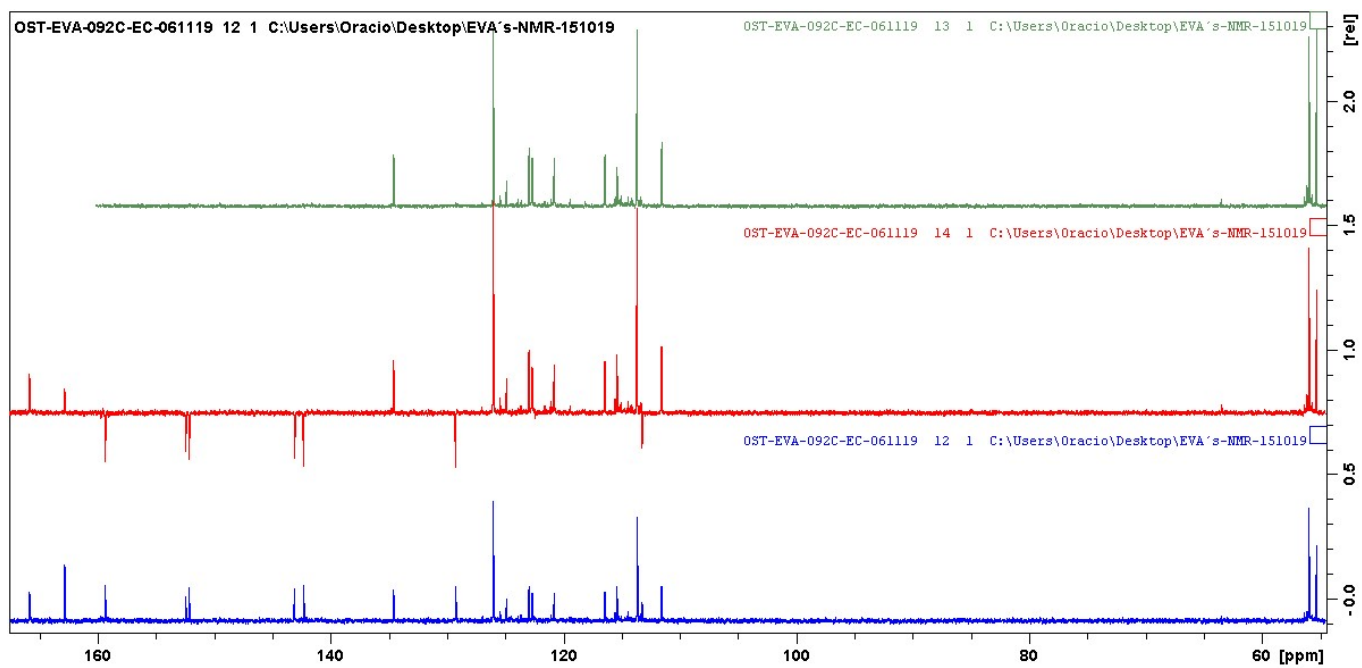

**Figure S.I.33.** Comparative of  $^{13}\text{C}\{^1\text{H}\}$  (blue), APT (red) and DEPT (green) spectrum of compound **1**.

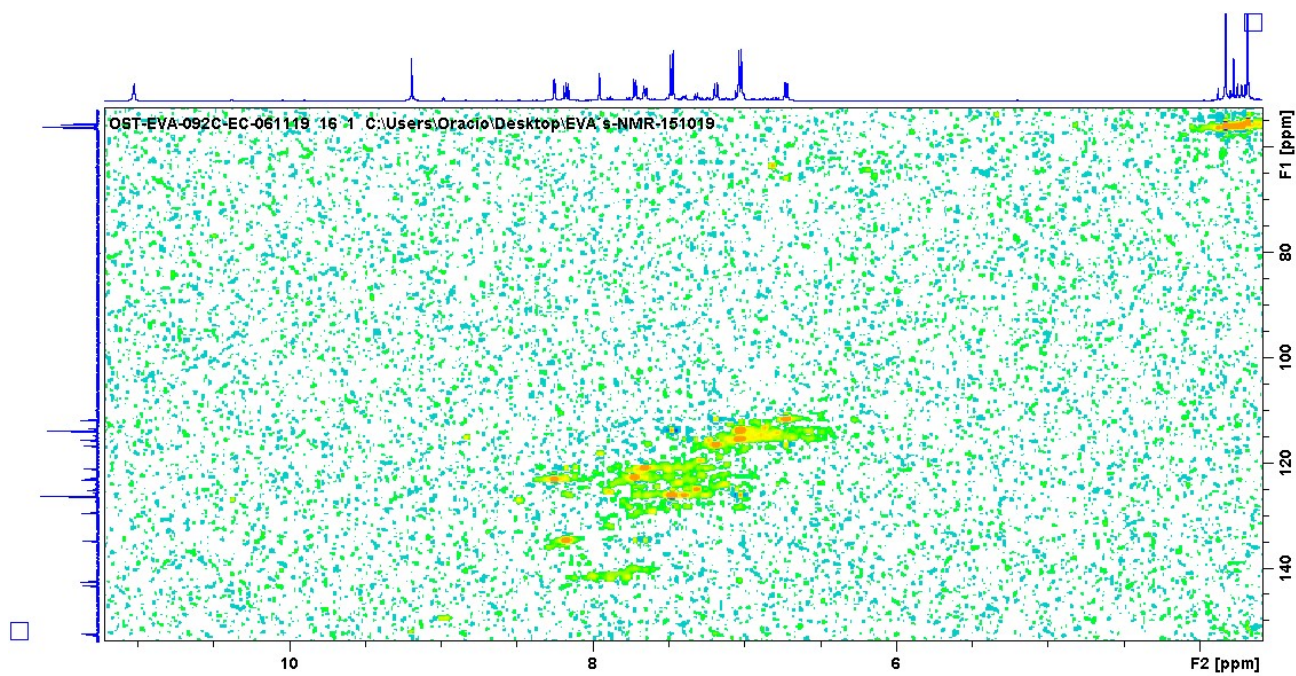

Figure S.I.34. HSQC NMR spectra for compound 1.



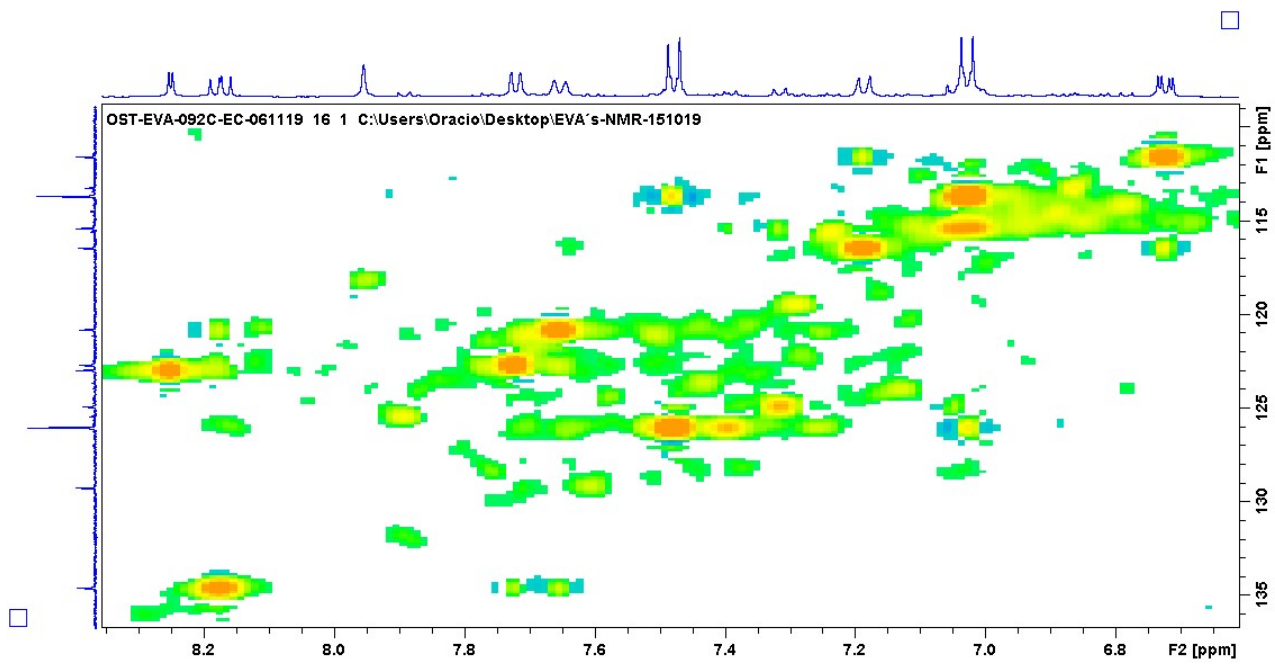

Figure S.I.35. HSQC NMR spectra for compound 1 (Region of aromatics).

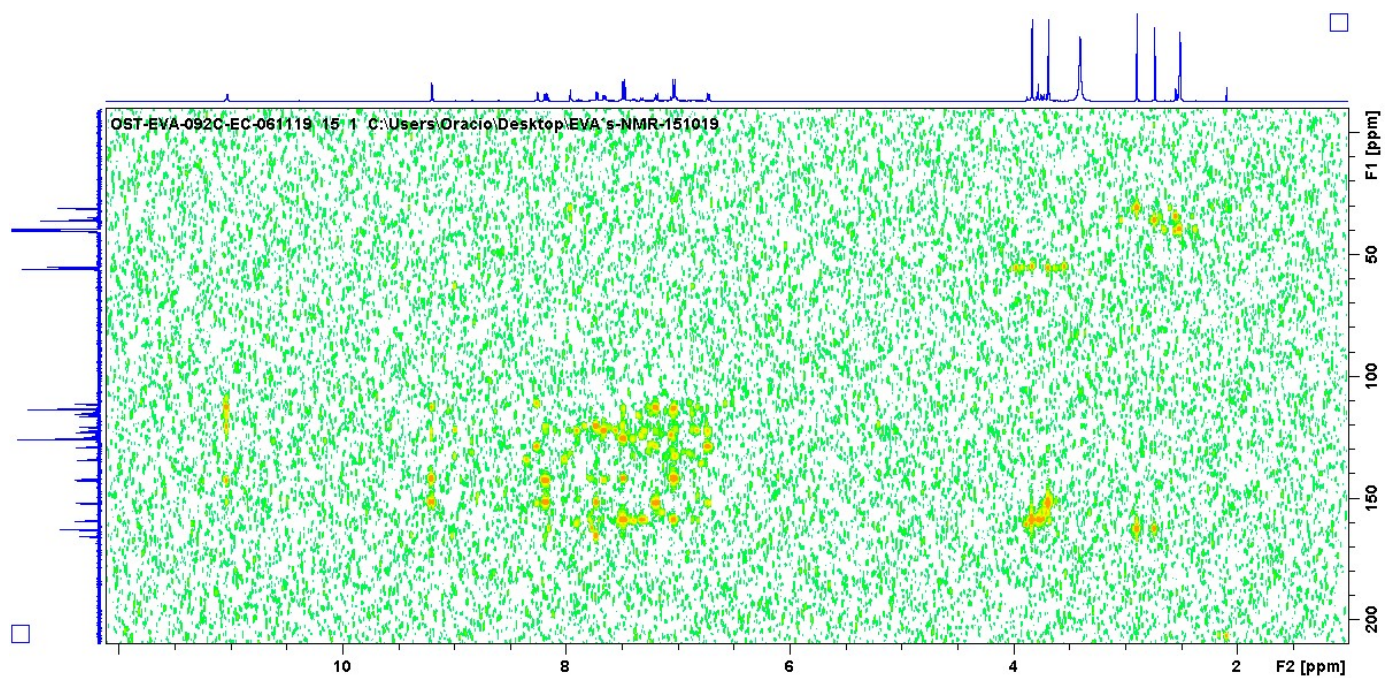

Figure S.I.36. HMBC NMR spectra for compound 1.

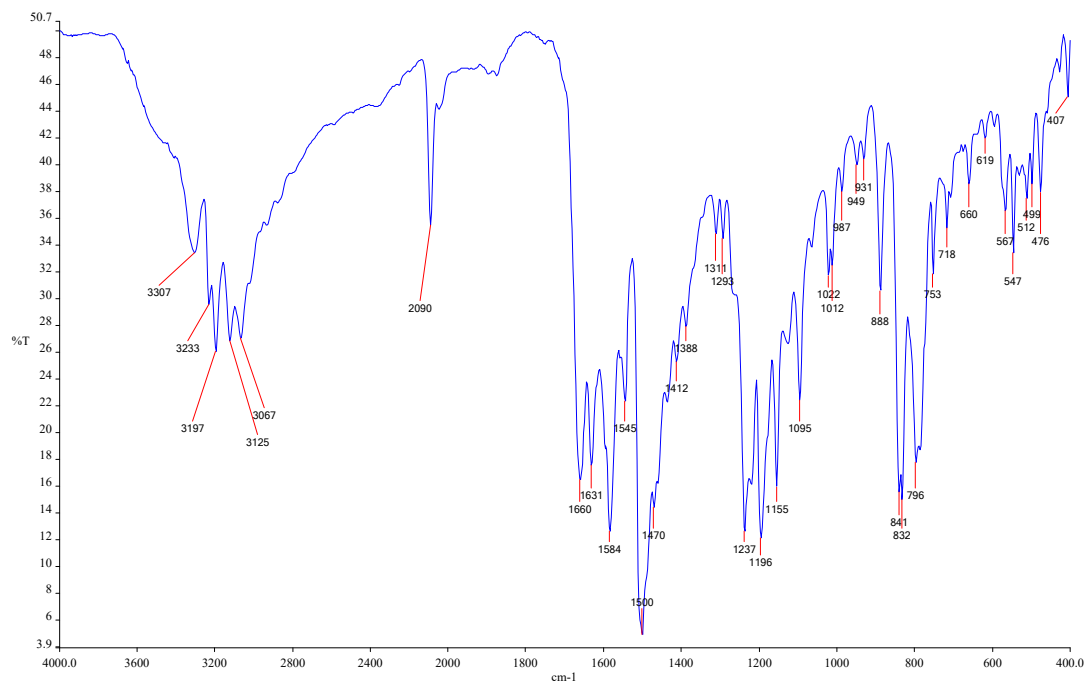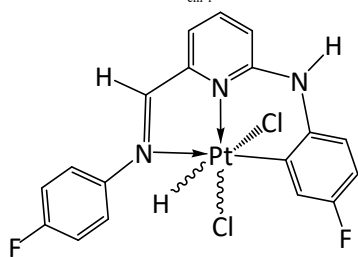

**2b**

**Figure S.I.37.** IR spectra for compound 2a (KBr disk).

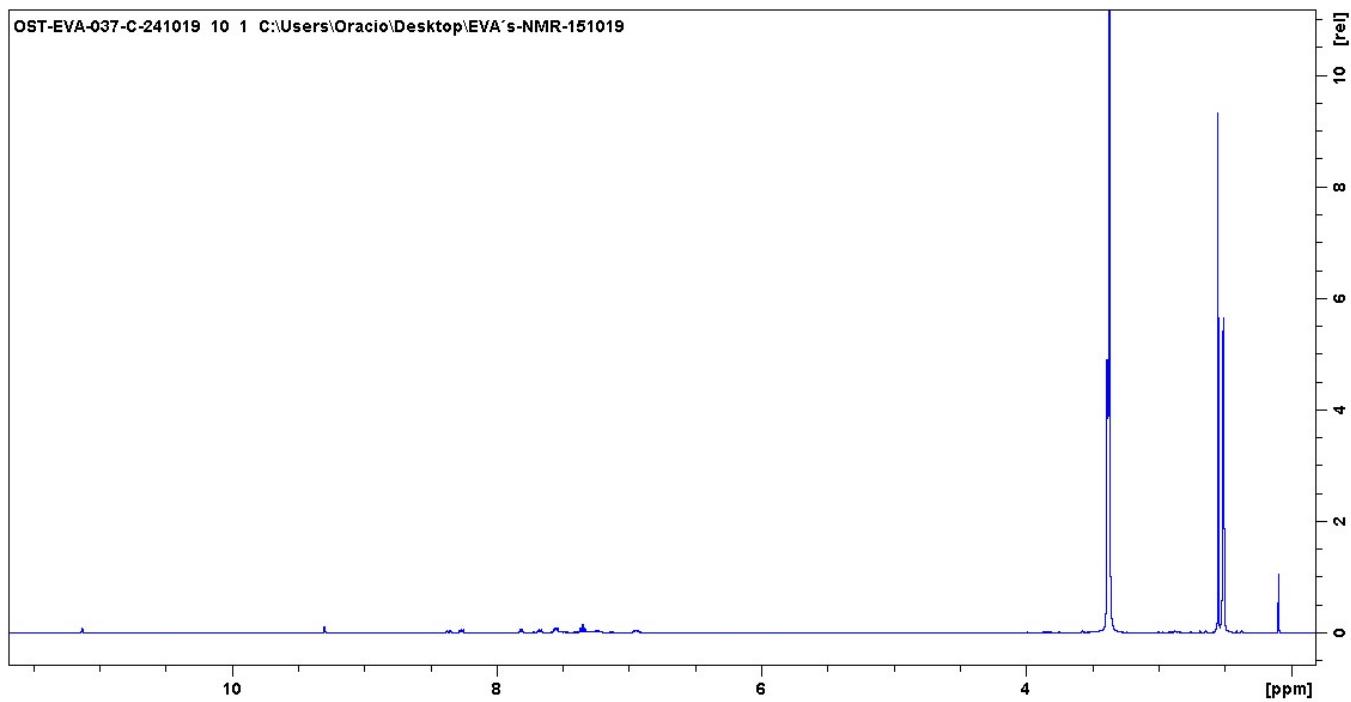

Figure S.I.38. <sup>1</sup>H NMR spectra for compound **2** (DMSO-d<sub>6</sub>).

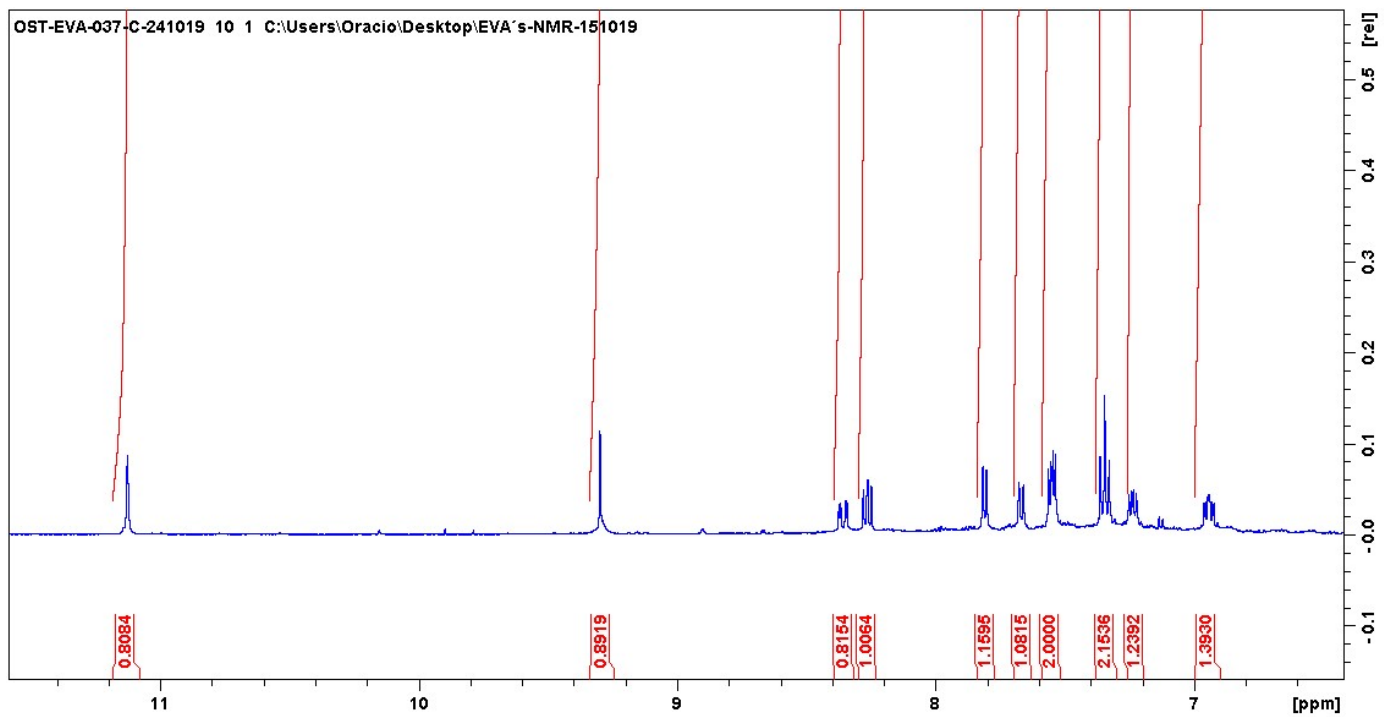

Figure S.I.39.  $^1\text{H}$  NMR spectra for compound **2** ( $\text{DMSO-d}_6$ , region from 6.6 to 11.6 ppm).

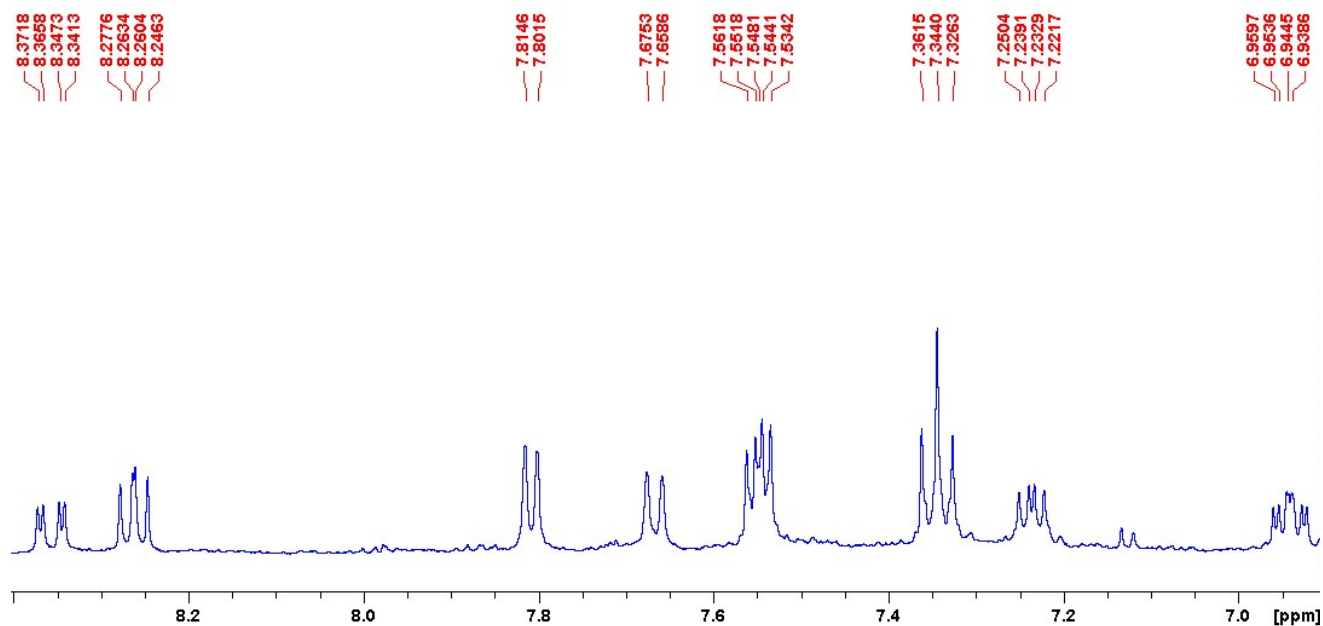

Figure S.I.40. <sup>1</sup>H NMR spectra for compound 2 (DMSO-d<sub>6</sub>, region from 6.8 to 8.4 ppm).

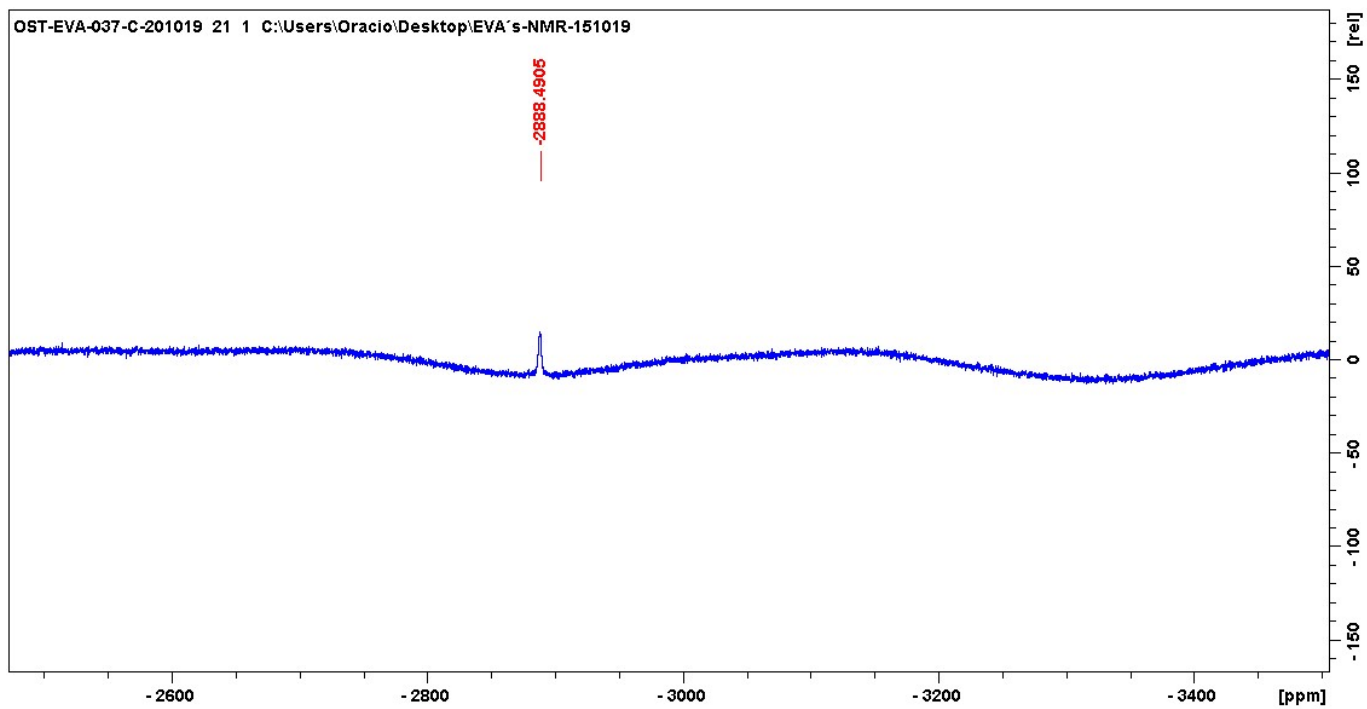

**Figure S.I.41.**  $^{195}\text{Pt}$  NMR spectra for compound **2** (DMSO- $d_6$ ).

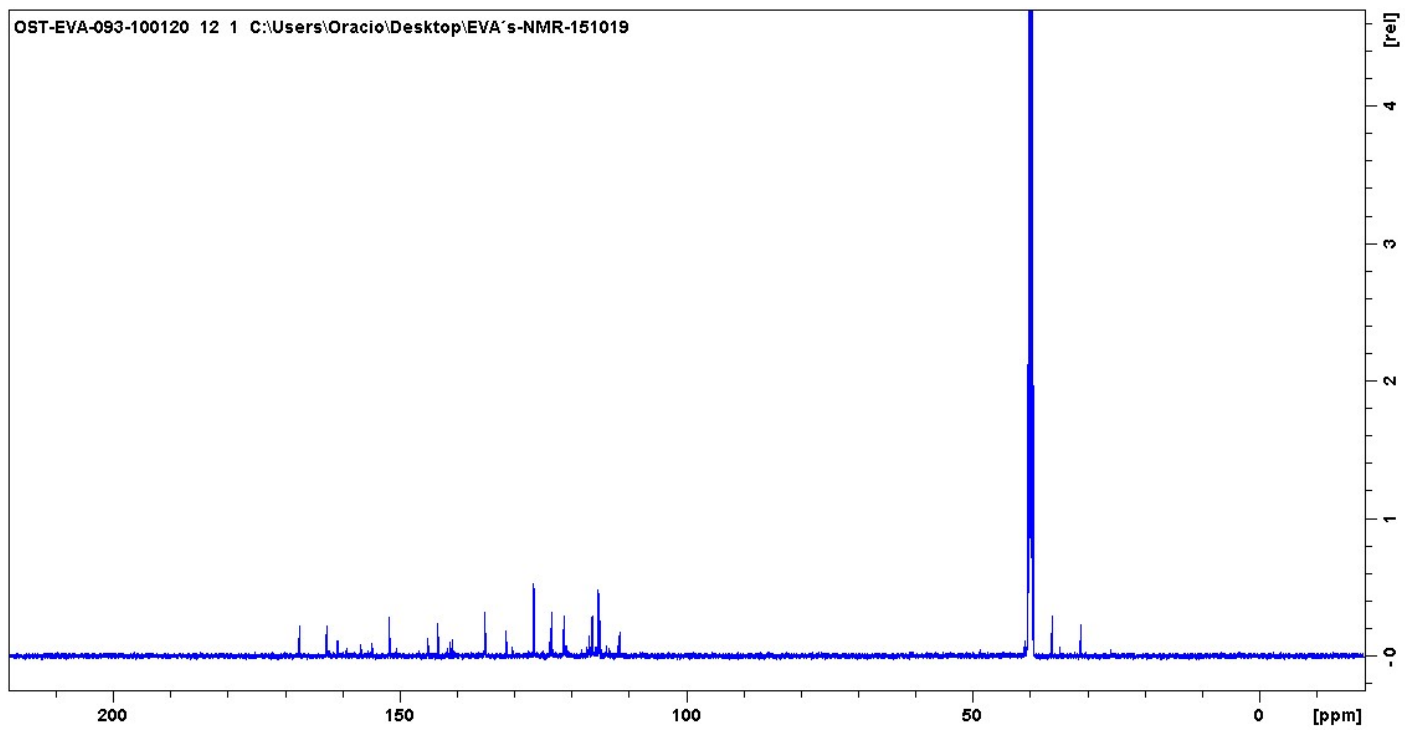

Figure S.I.42.  $^{13}\text{C}\{^1\text{H}\}$  NMR spectra for compound **2** (DMSO- $\text{d}_6$ ).



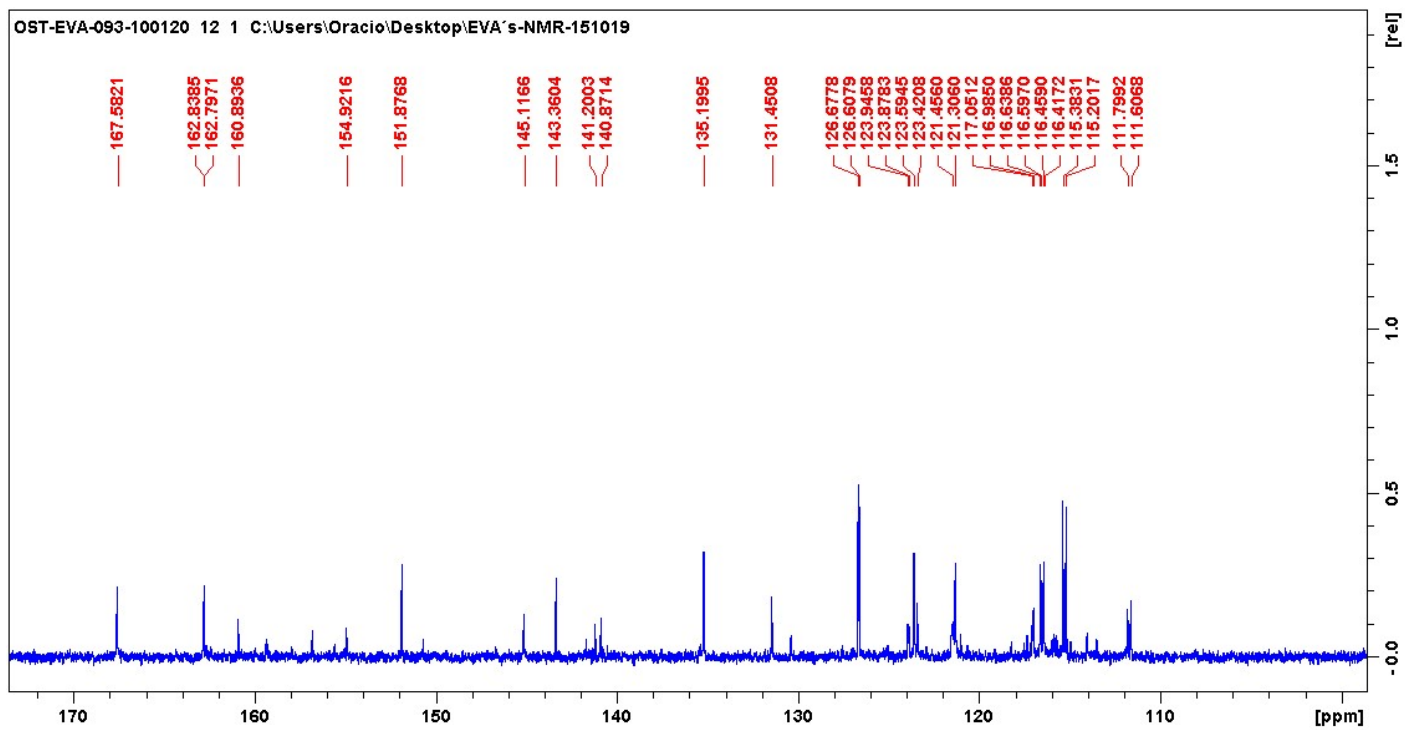

Figure S.I.43.  $^{13}\text{C}\{^1\text{H}\}$  NMR spectra for compound **2** (DMSO- $d_6$ , Region from 100 to 172 ppm).

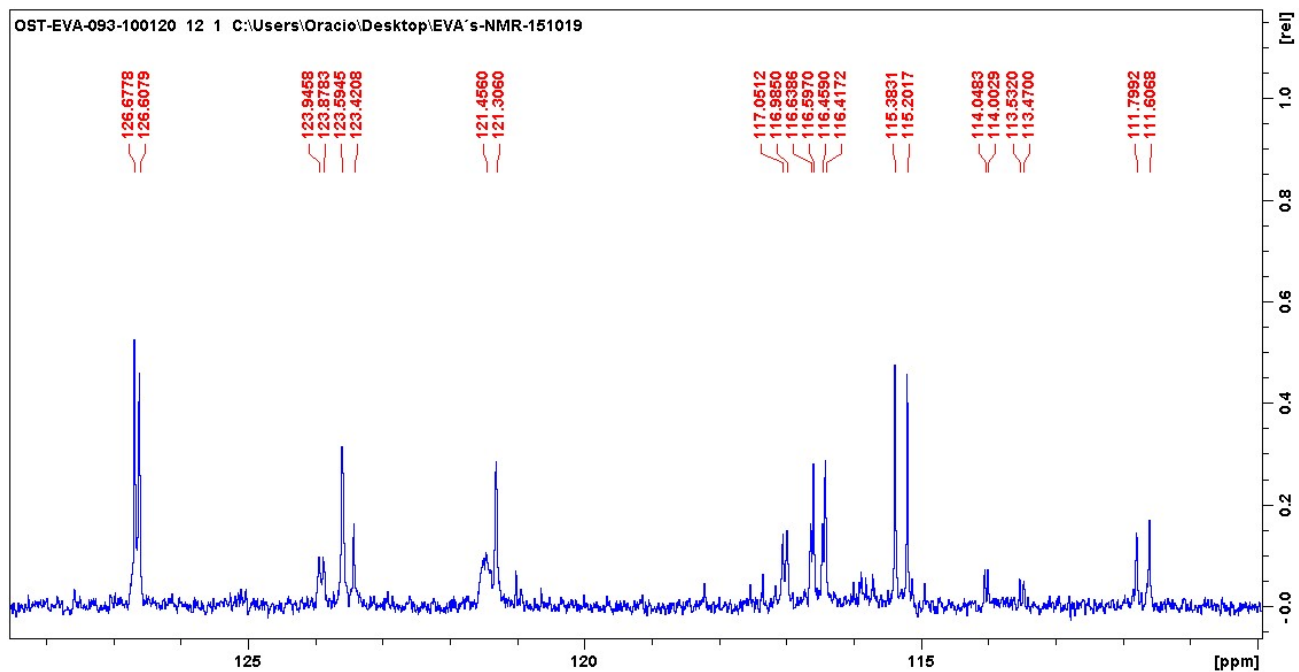

Figure S.I.44.  $^{13}\text{C}\{^1\text{H}\}$  NMR spectra for compound **2** (DMSO- $d_6$ , region from 110 to 129 ppm).

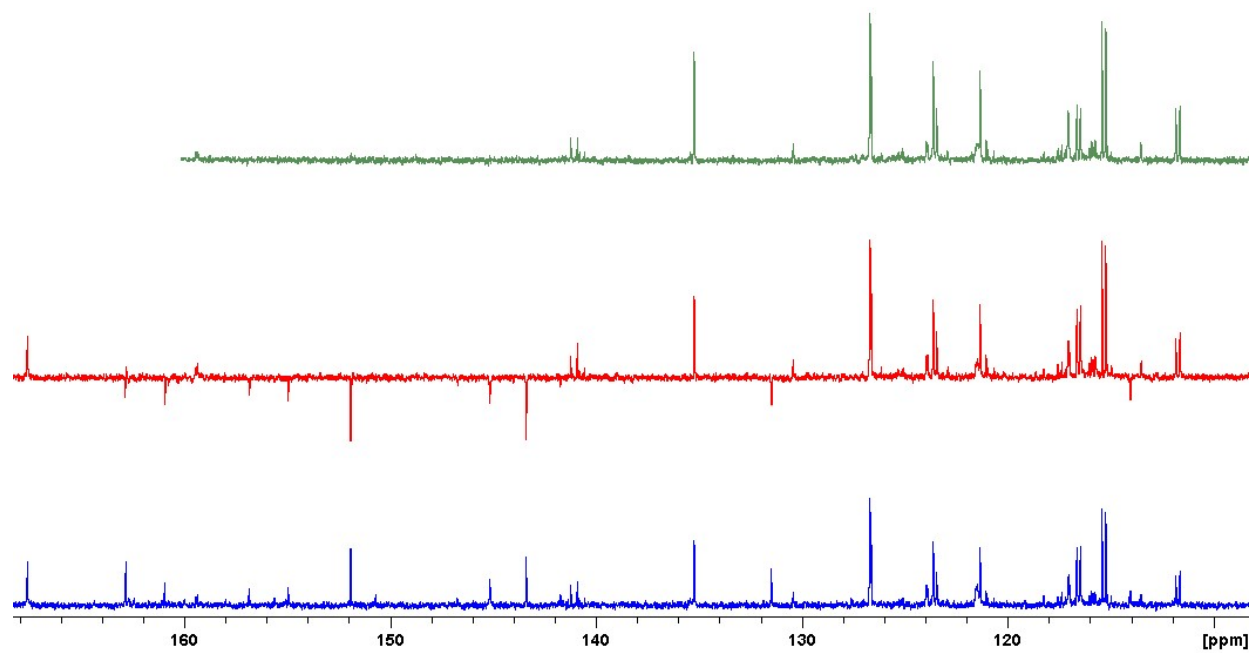

**Figure S.I.45.** Comparative of <sup>13</sup>C{<sup>1</sup>H} (blue), APT (red) and DEPT (green) spectrum of compound 2 (DMSO-d<sub>6</sub>).

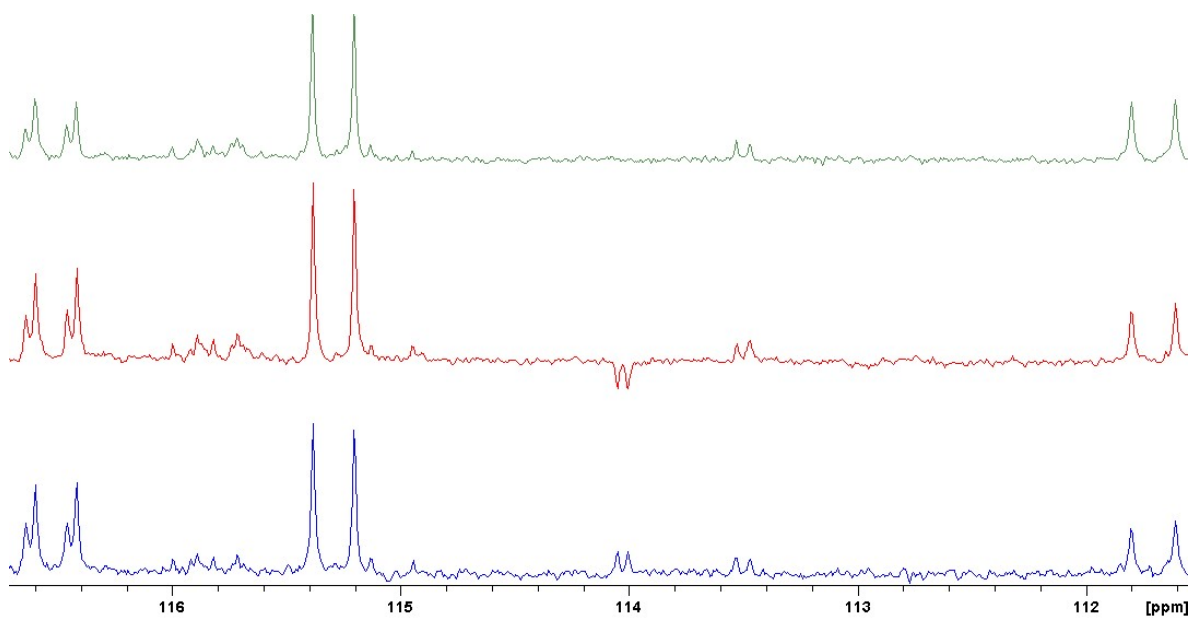

**Figure S.I.46.** Comparative of  $^{13}\text{C}\{^1\text{H}\}$  (blue), APT (red) and DEPT (green) spectrum of compound **2** (DMSO- $d_6$ , region from 111.6 to 116.8 ppm).

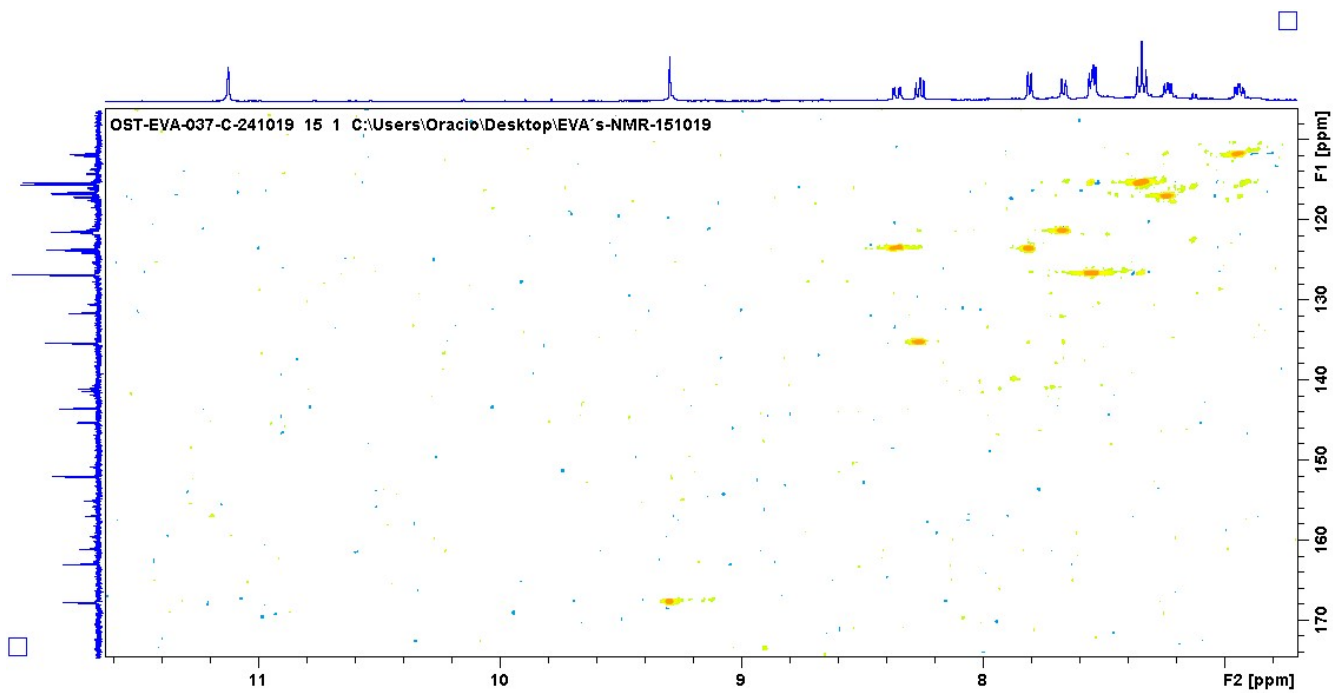

Figure S.I.47. HSQC NMR spectra for compound **2** (DMSO- $d_6$ ).

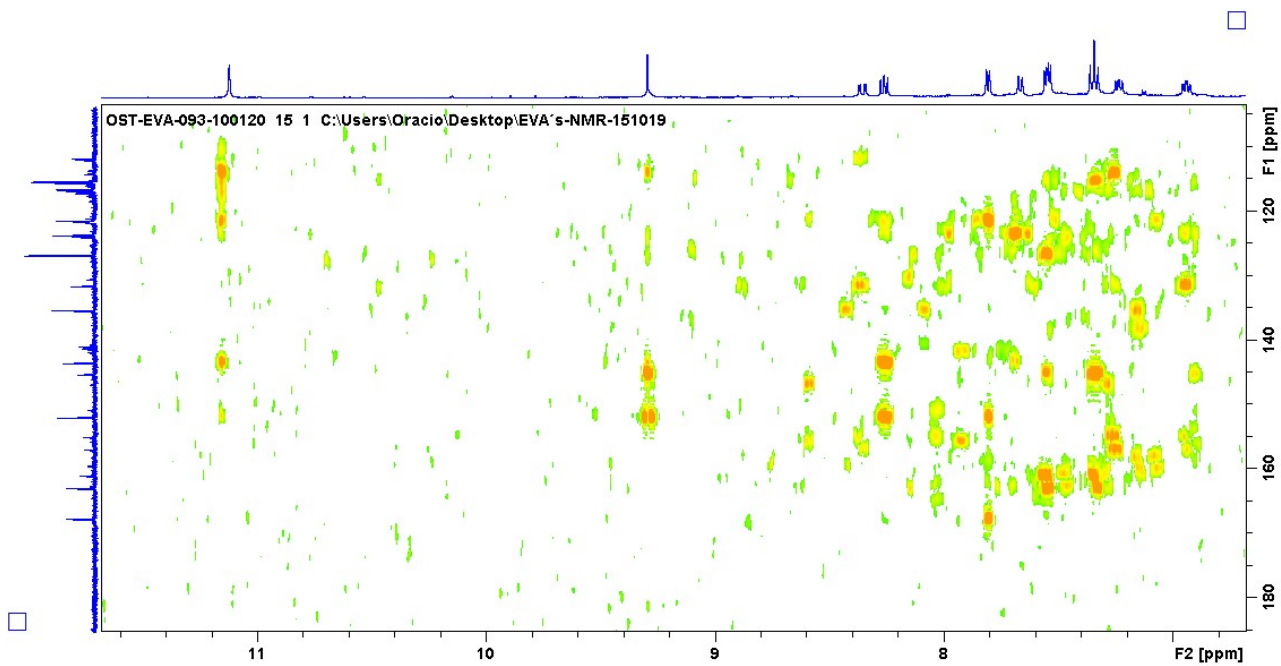

**Figure S.I.48.** HSQC NMR spectra for compound **2** (DMSO- $d_6$ , region of aromatics).

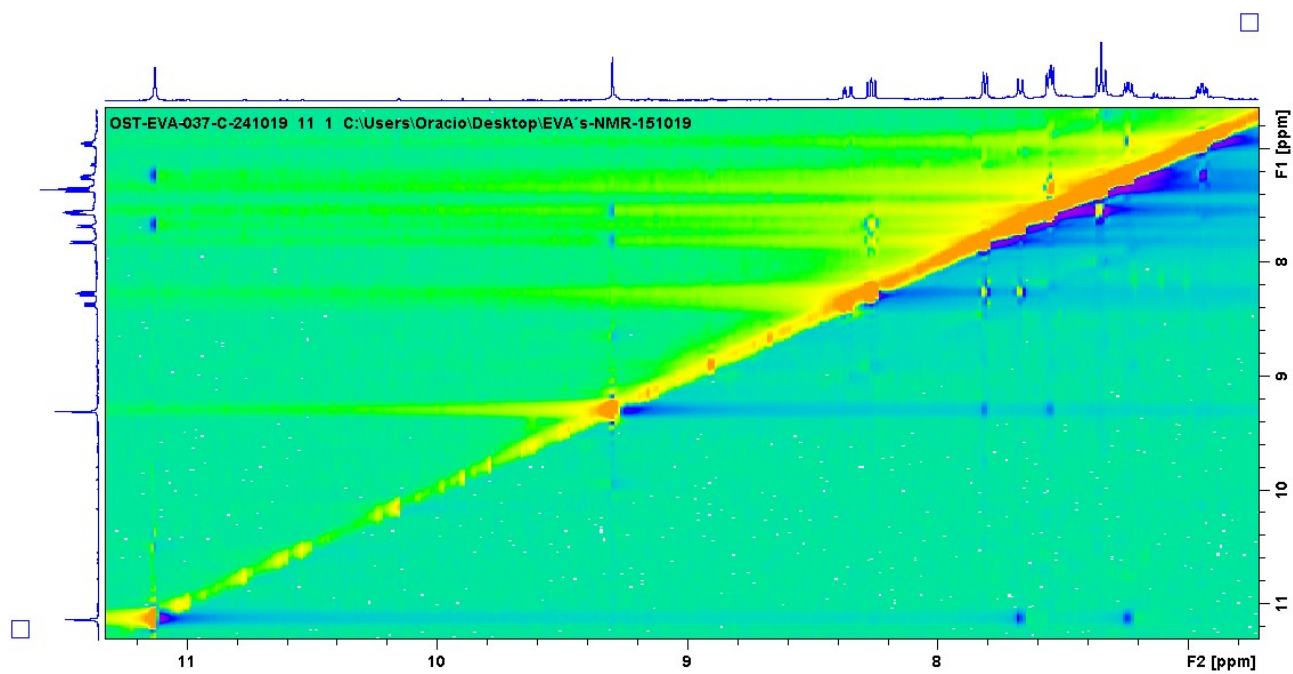

Figure S.I.49. NOESY NMR spectra for compound 2 (DMSO-d<sub>6</sub>).

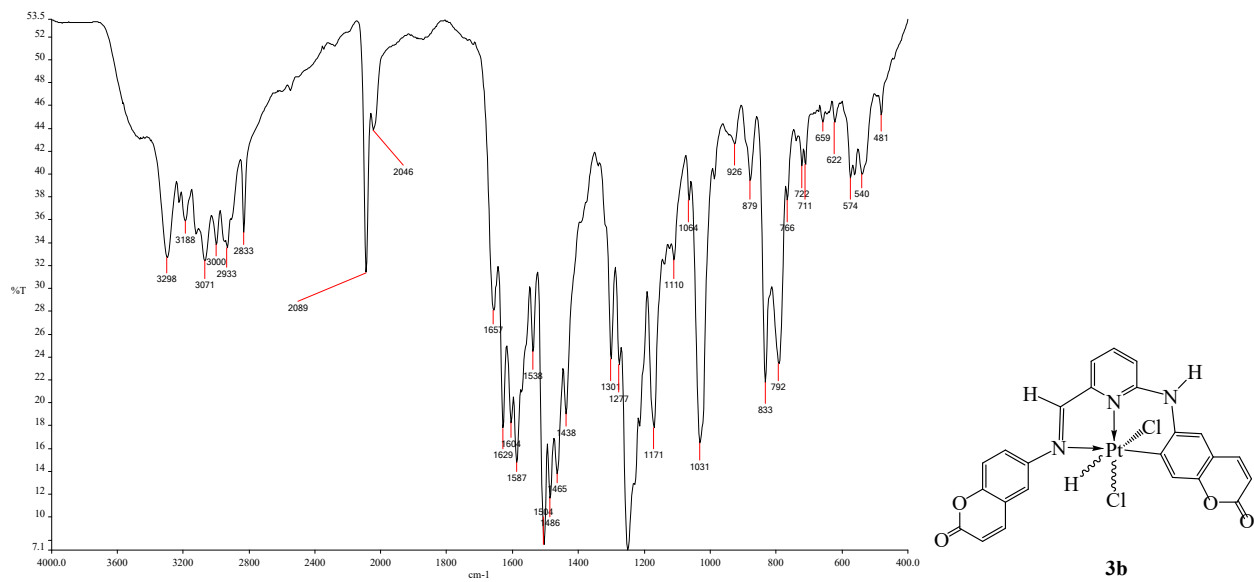

Figure S.I.50. IR spectra for compound **3b** (KBr disk).



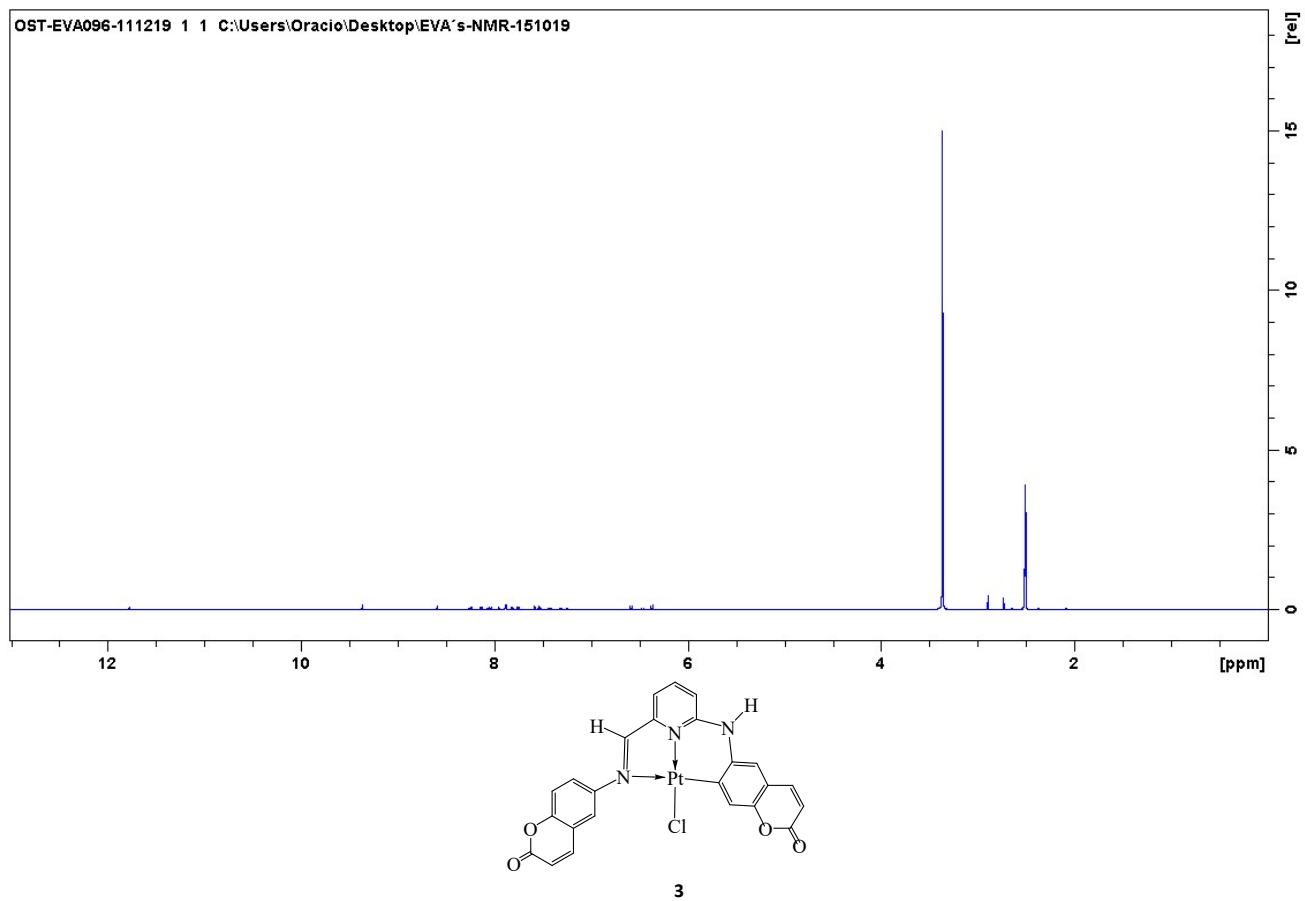

**Figure S.I.51.**  $^{13}\text{C}\{^1\text{H}\}$  NMR spectra for compound **3** (DMSO- $d_6$ ).

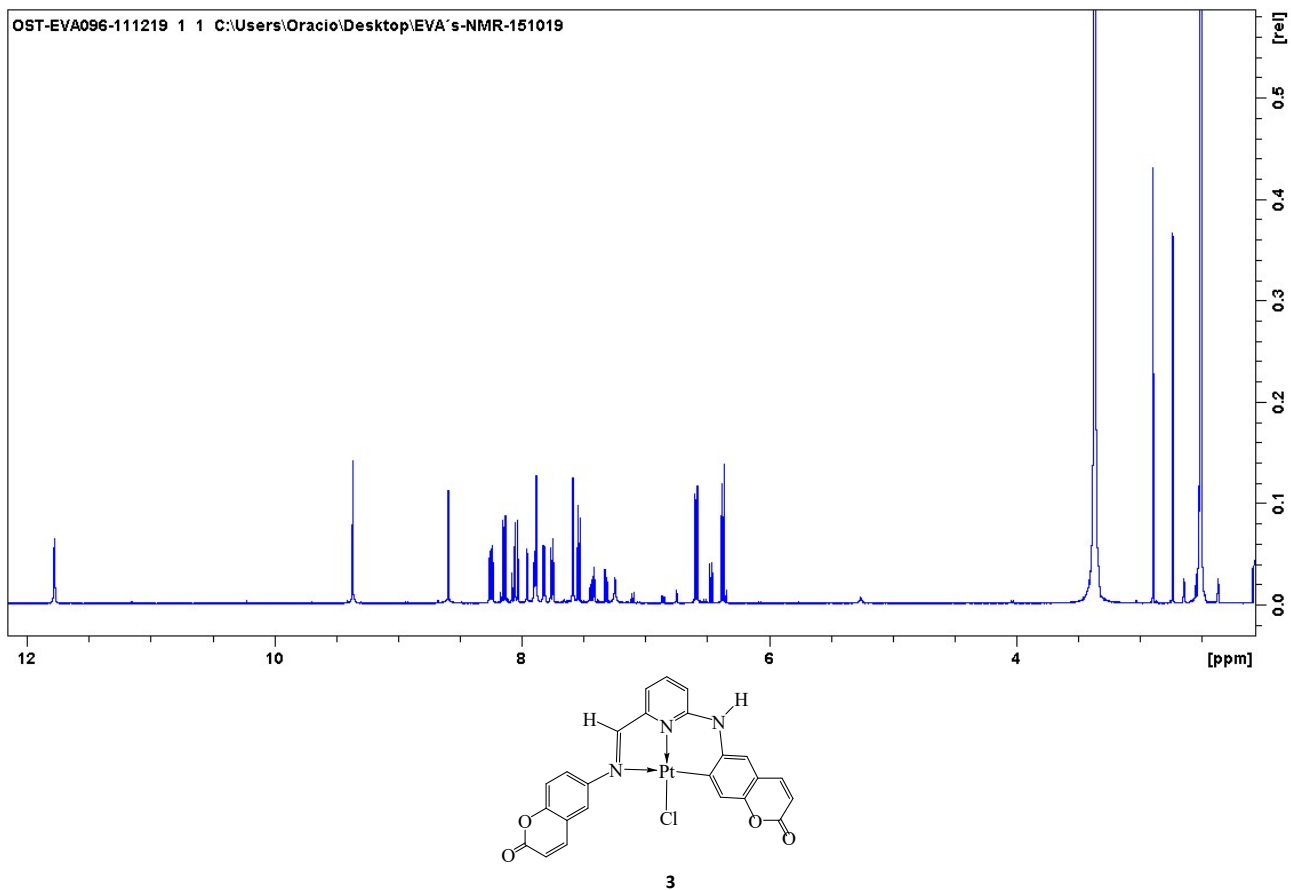

**Figure S.I.52.**  $^1\text{H}$  NMR spectra for compound **3** ( $\text{DMSO-d}_6$ , region from 3 to 12 ppm).

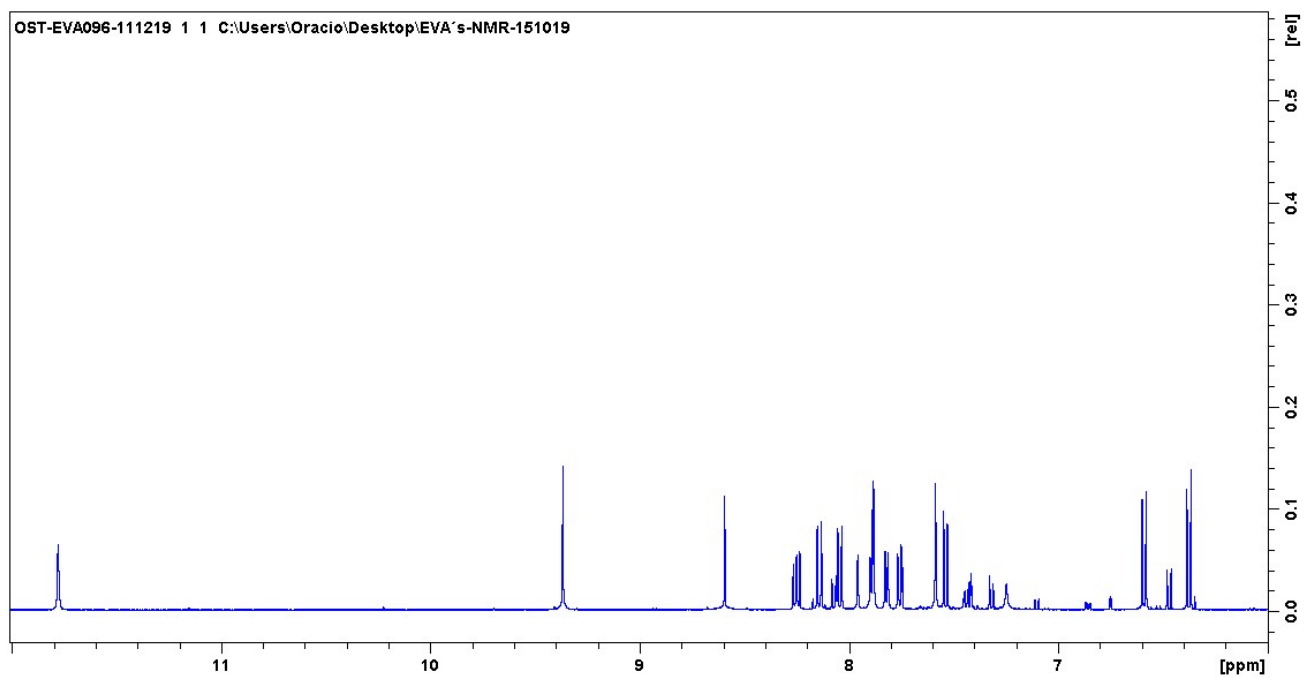

**Figure S.I.53.** <sup>1</sup>H NMR spectra for compound **3** (DMSO-d<sub>6</sub>, region from 6 to 12 ppm).

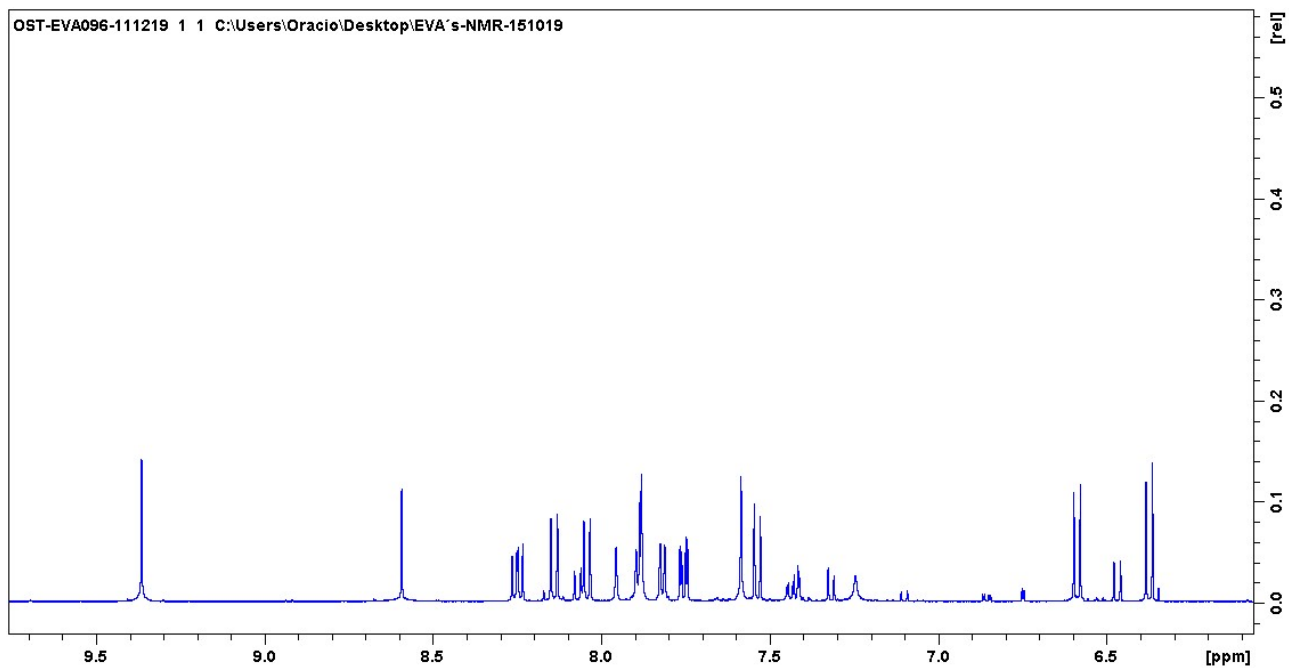

**Figure S.I.54.**  $^1\text{H}$  NMR spectra for compound **3** (DMSO- $d_6$ , region from 6 to 10 ppm).

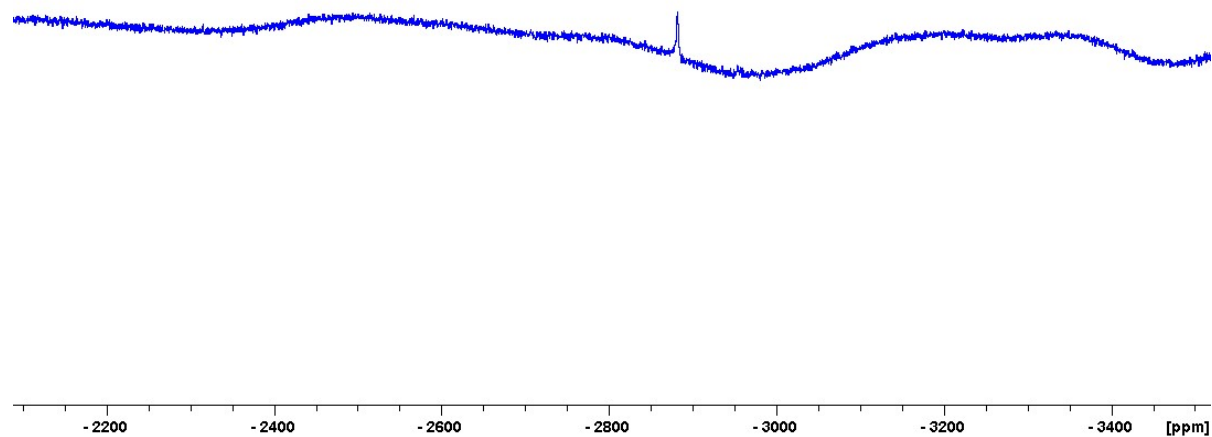

**Figure S.I.55.**  $^{195}\text{Pt}$  NMR spectra for compound **3** (DMSO- $\text{d}_6$ ).

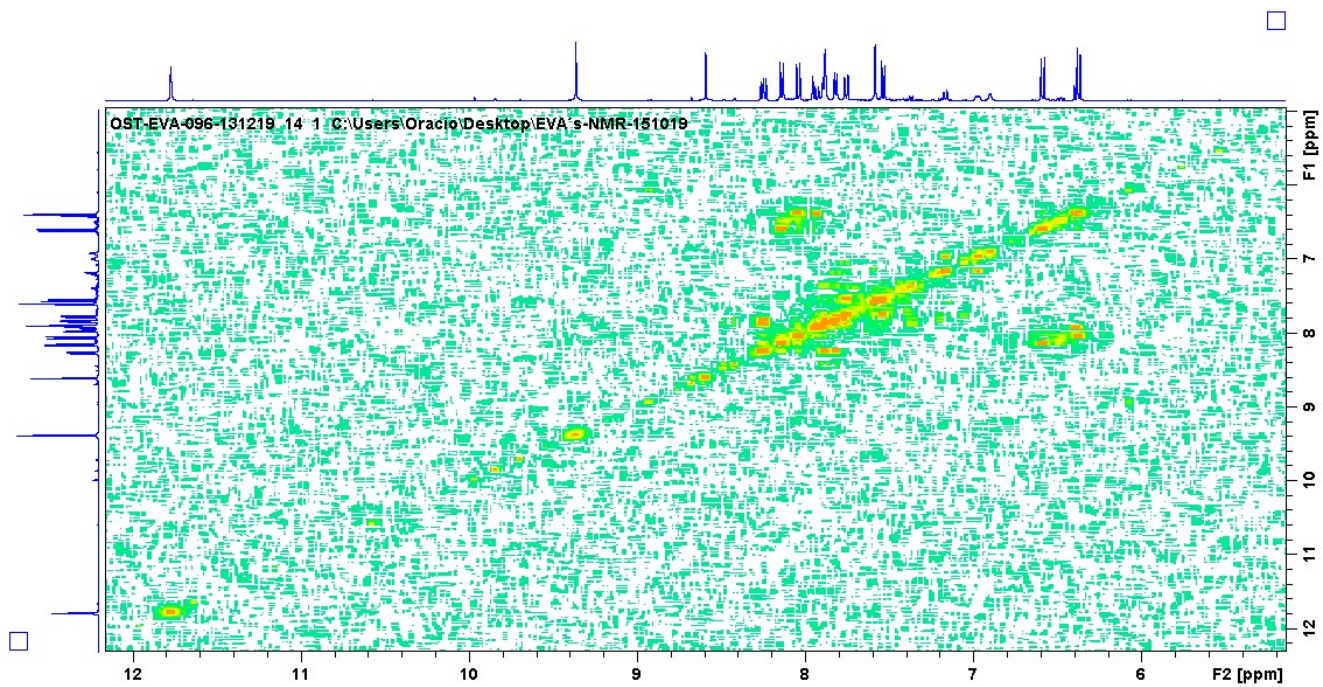

Figure S.I.56. COSY NMR spectra for compound **3** (DMSO- $d_6$ ).

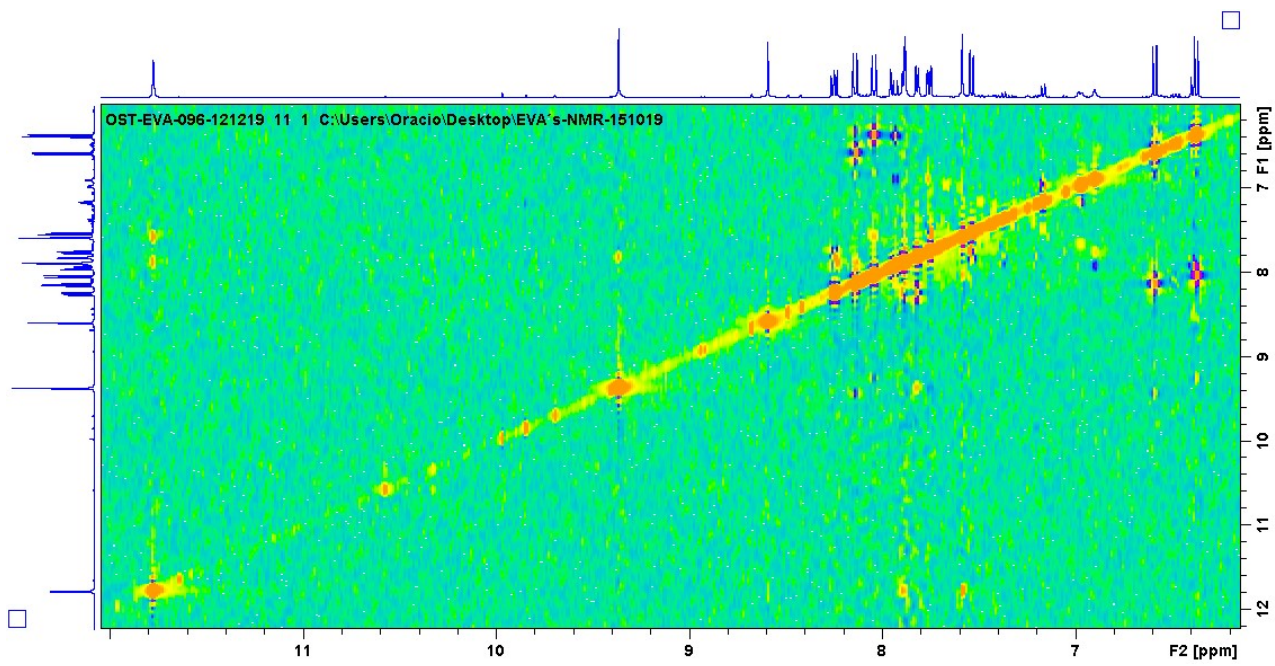

**Figure S.I.57.** NOESY NMR spectra for compound **3** (DMSO-d<sub>6</sub>, region of aromatics).

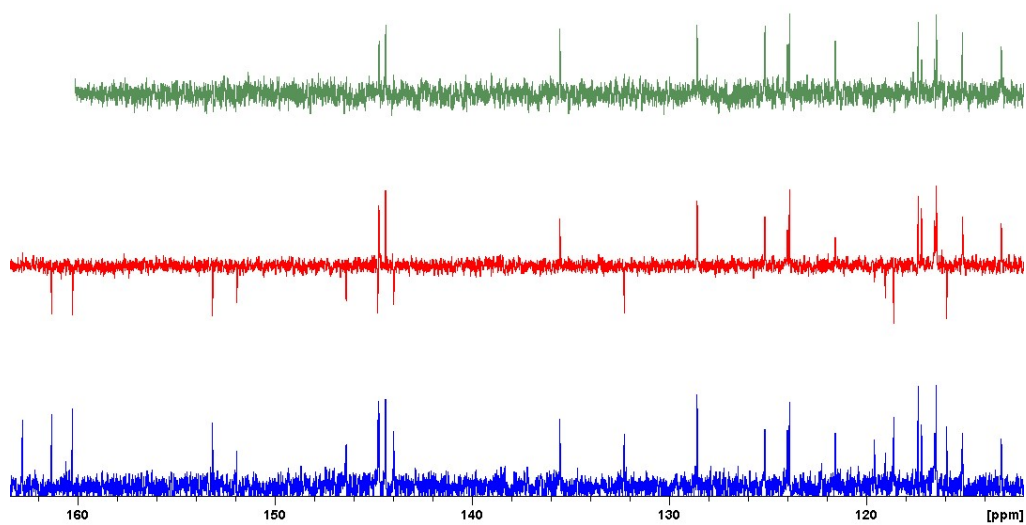

**Figure S.I.58.** Comparative of  $^{13}\text{C}\{^1\text{H}\}$  (blue), APT (red) and DEPT (green) spectrum of compound **3** ( $\text{DMSO-d}_6$ , region from 110 to 164 ppm).



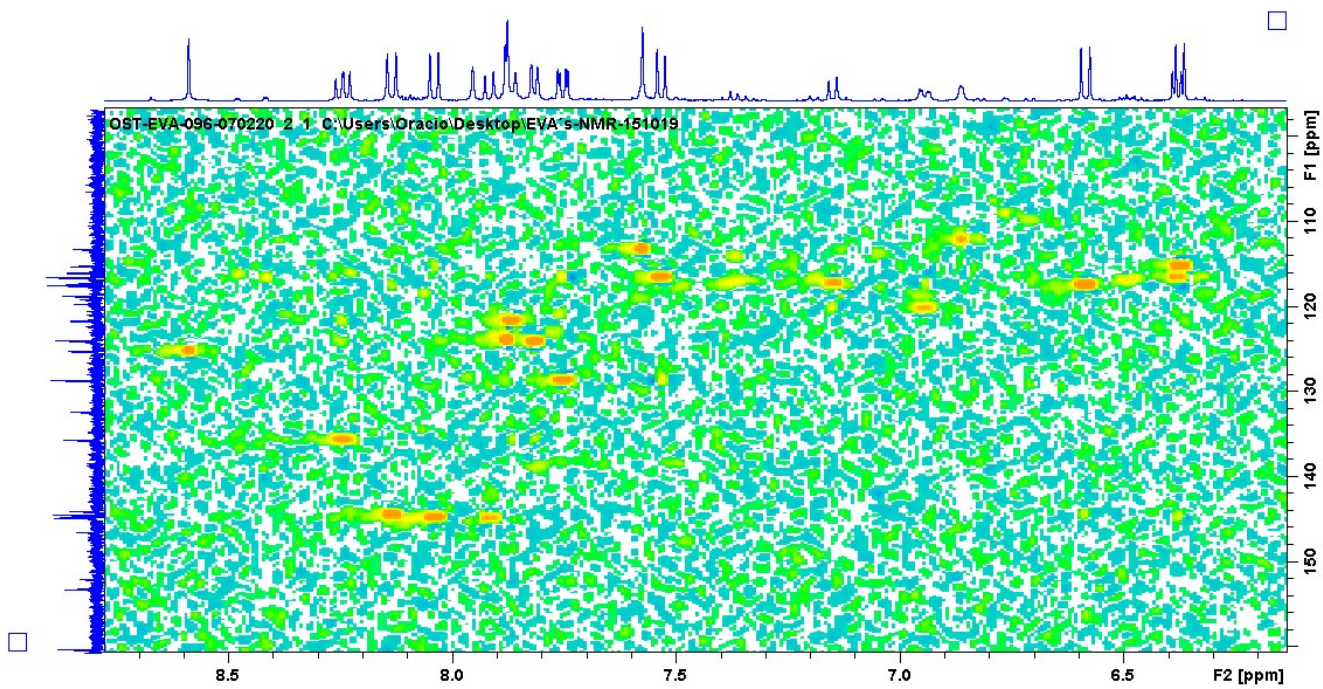

Figure S.I.59. HSQC of compound 3 (DMSO-d<sub>6</sub>).
